# Supplementary material for: Systematic Review on Treatment and Outcomes of Tuberculous Peritonitis in Patients on Peritoneal Dialysis
Source: PubMed Central journal article supplement — Kidney Int Rep. 2023 Nov 19;9(2):277–86. doi: 10.1016/j.ekir.2023.11.012 (PMC10850995; doi:10.1016/j.ekir.2023.11.012), 2023-11-19
Supplement: mmc1.pdf [file mmc1.pdf]

**Systematic review on treatment and outcomes of tuberculous peritonitis in patients on peritoneal dialysis**

**Short title:** Treatment & outcomes of peritonitis due to *M. tuberculosis* in patients on PD

**Chau Wei Ling<sup>1</sup>, Kamal Sud<sup>2,3,4</sup> Ronald L Castelino<sup>1,5</sup>, David W Johnson<sup>4,6,7,8</sup>, Trevor H Y Tan<sup>9</sup>, Vincent W Lee<sup>10,11,12</sup>**

- 1) Faculty of Medicine and Health, The University of Sydney, New South Wales, Australia
- 2) Nepean Kidney Research Centre, Department of Renal Medicine, Nepean Hospital, Sydney, New South Wales, Australia
- 3) Peritoneal Dialysis Unit, Regional Dialysis Centre, Blacktown Hospital, Sydney, New South Wales, Australia
- 4) Australia and New Zealand Dialysis and Transplant (ANZDATA) Registry Peritoneal Dialysis Working Group, Adelaide, South Australia
- 5) Department of Pharmacy, Blacktown Hospital, Blacktown, New South Wales, Australia
- 6) Australasian Kidney Trials Network, University of Queensland, Brisbane, Australia
- 7) Department of Kidney and Transplant Services, Princess Alexandra Hospital, Brisbane, Australia
- 8) Translational Research Institute, Brisbane, Australia
- 9) National Centre for Infectious Diseases, Singapore
- 10) Department of Renal Medicine, Westmead Hospital, New South Wales, Australia
- 11) Westmead Applied Research Centre, Faculty of Medicine and Health, The University of Sydney, Australia

12) Centre for Kidney Research, School of Public Health, The University of Sydney, New South Wales, Australia

**Corresponding author:**

Associate Professor Vincent W Lee

Department of Renal Medicine, Westmead Hospital

Faculty of Medicine and Health, Westmead Applied Research Centre, NSW 2006 Australia

Email: [vincent.lee@sydney.edu.au](mailto:vincent.lee@sydney.edu.au)

## **Supplementary File 1: PRISMA Checklist**

Reporting checklist for systematic review (with or without a meta-analysis).

Based on the PRISMA guidelines.

|                         |                    | Reporting Item                                                                                                                                                                                                                                                                   | Page Number                   |
|-------------------------|--------------------|----------------------------------------------------------------------------------------------------------------------------------------------------------------------------------------------------------------------------------------------------------------------------------|-------------------------------|
| <b>Title</b>            |                    |                                                                                                                                                                                                                                                                                  |                               |
| Title                   | <a href="#">#1</a> | Identify the report as a systematic review                                                                                                                                                                                                                                       | 1                             |
| <b>Abstract</b>         |                    |                                                                                                                                                                                                                                                                                  |                               |
| Abstract                | <a href="#">#2</a> | Report an abstract addressing each item in the PRISMA 2020 for Abstracts checklist                                                                                                                                                                                               | 3                             |
| <b>Introduction</b>     |                    |                                                                                                                                                                                                                                                                                  |                               |
| Background/rationale    | <a href="#">#3</a> | Describe the rationale for the review in the context of existing knowledge                                                                                                                                                                                                       | 5                             |
| Objectives              | <a href="#">#4</a> | Provide an explicit statement of the objective(s) or question(s) the review addresses                                                                                                                                                                                            | 5                             |
| <b>Methods</b>          |                    |                                                                                                                                                                                                                                                                                  |                               |
| Eligibility criteria    | <a href="#">#5</a> | Specify the inclusion and exclusion criteria for the review and how studies were grouped for the syntheses                                                                                                                                                                       | 6                             |
| Information sources     | <a href="#">#6</a> | Specify all databases, registers, websites, organisations, reference lists, and other sources searched or consulted to identify studies. Specify the date when each source was last searched or consulted                                                                        | 6                             |
| Search strategy         | <a href="#">#7</a> | Present the full search strategies for all databases, registers, and websites, including any filters and limits used                                                                                                                                                             | Supplementary material 1 pg 3 |
| Selection process       | <a href="#">#8</a> | Specify the methods used to decide whether a study met the inclusion criteria of the review, including how many reviewers screened each record and each report retrieved, whether they worked independently, and, if applicable, details of automation tools used in the process | 7                             |
| Data collection process | <a href="#">#9</a> | Specify the methods used to collect data from reports, including how many reviewers collected data from each report, whether they worked independently, any processes for obtaining or confirming data from study investigators, and, if                                         | 7                             |

|                               |                      |                                                                                                                                                                                                                                                                                       |     |
|-------------------------------|----------------------|---------------------------------------------------------------------------------------------------------------------------------------------------------------------------------------------------------------------------------------------------------------------------------------|-----|
|                               |                      | applicable, details of automation tools used in the process                                                                                                                                                                                                                           |     |
| Data items                    | <a href="#">#10a</a> | List and define all outcomes for which data were sought. Specify whether all results that were compatible with each outcome domain in each study were sought (for example, for all measures, time points, analyses), and, if not, the methods used to decide which results to collect | 6   |
| Study risk of bias assessment | <a href="#">#11</a>  | Specify the methods used to assess risk of bias in the included studies, including details of the tool(s) used, how many reviewers assessed each study and whether they worked independently, and, if applicable, details of automation tools used in the process                     | N/A |
| Effect measures               | <a href="#">#12</a>  | Specify for each outcome the effect measure(s) (such as risk ratio, mean difference) used in the synthesis or presentation of results                                                                                                                                                 | N/A |
| Synthesis methods             | <a href="#">#13a</a> | Describe the processes used to decide which studies were eligible for each synthesis (such as tabulating the study intervention characteristics and comparing against the planned groups for each synthesis (item #5))                                                                | N/A |
| Synthesis methods             | <a href="#">#13b</a> | Describe any methods required to prepare the data for presentation or synthesis, such as handling of missing summary statistics or data conversions                                                                                                                                   | N/A |
| Synthesis methods             | <a href="#">#13c</a> | Describe any methods used to tabulate or visually display results of individual studies and syntheses                                                                                                                                                                                 | N/A |
| Synthesis methods             | <a href="#">#13d</a> | Describe any methods used to synthesise results and provide a rationale for the choice(s). If meta-analysis was performed, describe the model(s), method(s) to identify the presence and extent of statistical heterogeneity, and software package(s) used                            | N/A |
| Synthesis methods             | <a href="#">#13e</a> | Describe any methods used to explore possible causes of heterogeneity among study results (such as subgroup analysis, meta-regression)                                                                                                                                                | N/A |
| Synthesis methods             | <a href="#">#13f</a> | Describe any sensitivity analyses conducted to assess robustness of the synthesised results                                                                                                                                                                                           | N/A |
| Reporting bias assessment     | <a href="#">#14</a>  | Describe any methods used to assess risk of bias due to missing results in a synthesis (arising from reporting biases)                                                                                                                                                                | N/A |

|                               |                      |                                                                                                                                                                                                                                                                                                                                       |                          |
|-------------------------------|----------------------|---------------------------------------------------------------------------------------------------------------------------------------------------------------------------------------------------------------------------------------------------------------------------------------------------------------------------------------|--------------------------|
| Certainty assessment          | <a href="#">#15</a>  | Describe any methods used to assess certainty (or confidence) in the body of evidence for an outcome                                                                                                                                                                                                                                  | N/A                      |
| Data items                    | <a href="#">#10b</a> | List and define all other variables for which data were sought (such as participant and intervention characteristics, funding sources). Describe any assumptions made about any missing or unclear information                                                                                                                        | 18                       |
| <b>Results</b>                |                      |                                                                                                                                                                                                                                                                                                                                       |                          |
| Study selection               | <a href="#">#16a</a> | Describe the results of the search and selection process, from the number of records identified in the search to the number of studies included in the review, ideally using a flow diagram ( <a href="http://www.prisma-statement.org/PRISMAStatement/FlowDiagram">http://www.prisma-statement.org/PRISMAStatement/FlowDiagram</a> ) | 25                       |
| Study selection               | <a href="#">#16b</a> | Cite studies that might appear to meet the inclusion criteria, but which were excluded, and explain why they were excluded                                                                                                                                                                                                            | 25                       |
| Study characteristics         | <a href="#">#17</a>  | Cite each included study and present its characteristics                                                                                                                                                                                                                                                                              | Supplementary Material 2 |
| Risk of bias in studies       | <a href="#">#18</a>  | Present assessments of risk of bias for each included study                                                                                                                                                                                                                                                                           | N/A                      |
| Results of individual studies | <a href="#">#19</a>  | For all outcomes, present for each study (a) summary statistics for each group (where appropriate) and (b) an effect estimate and its precision (such as confidence/credible interval), ideally using structured tables or plots                                                                                                      | N/A                      |
| Results of syntheses          | <a href="#">#20a</a> | For each synthesis, briefly summarise the characteristics and risk of bias among contributing studies                                                                                                                                                                                                                                 | N/A                      |
| Results of syntheses          | <a href="#">#20b</a> | Present results of all statistical syntheses conducted. If meta-analysis was done, present for each the summary estimate and its precision (such as confidence/credible interval) and measures of statistical heterogeneity. If comparing groups, describe the direction of the effect                                                | N/A                      |
| Results of syntheses          | <a href="#">#20c</a> | Present results of all investigations of possible causes of heterogeneity among study results                                                                                                                                                                                                                                         | N/A                      |
| Results of syntheses          | <a href="#">#20d</a> | Present results of all sensitivity analyses conducted to assess the robustness of the synthesised results                                                                                                                                                                                                                             | N/A                      |

|                                                 |                      |                                                                                                                                                                                                                                           |       |
|-------------------------------------------------|----------------------|-------------------------------------------------------------------------------------------------------------------------------------------------------------------------------------------------------------------------------------------|-------|
| Risk of reporting biases in syntheses           | <a href="#">#21</a>  | Present assessments of risk of bias due to missing results (arising from reporting biases) for each synthesis assessed                                                                                                                    | N/A   |
| Certainty of evidence                           | <a href="#">#22</a>  | Present assessments of certainty (or confidence) in the body of evidence for each outcome assessed                                                                                                                                        | N/A   |
| <b>Discussion</b>                               |                      |                                                                                                                                                                                                                                           |       |
| Results in context                              | <a href="#">#23a</a> | Provide a general interpretation of the results in the context of other evidence                                                                                                                                                          | 13-16 |
| Limitations of included studies                 | <a href="#">#23b</a> | Discuss any limitations of the evidence included in the review                                                                                                                                                                            | 16-17 |
| Limitations of the review methods               | <a href="#">#23c</a> | Discuss any limitations of the review processes used                                                                                                                                                                                      | 16-17 |
| Implications                                    | <a href="#">#23d</a> | Discuss implications of the results for practice, policy, and future research                                                                                                                                                             | 17    |
| <b>Other information</b>                        |                      |                                                                                                                                                                                                                                           |       |
| Registration and protocol                       | <a href="#">#24a</a> | Provide registration information for the review, including register name and registration number, or state that the review was not registered                                                                                             | 6     |
| Registration and protocol                       | <a href="#">#24b</a> | Indicate where the review protocol can be accessed, or state that a protocol was not prepared                                                                                                                                             | 6     |
| Registration and protocol                       | <a href="#">#24c</a> | Describe and explain any amendments to information provided at registration or in the protocol                                                                                                                                            | N/A   |
| Support                                         | <a href="#">#25</a>  | Describe sources of financial or non-financial support for the review, and the role of the funders or sponsors in the review                                                                                                              | 27    |
| Competing interests                             | <a href="#">#26</a>  | Declare any competing interests of review authors                                                                                                                                                                                         | 27    |
| Availability of data, code, and other materials | <a href="#">#27</a>  | Report which of the following are publicly available and where they can be found: template data collection forms; data extracted from included studies; data used for all analyses; analytic code; any other materials used in the review | N/A   |

Notes:

- 7: Supplementary material 1 pg 3
- 17: Supplementary Material 2 The PRISMA checklist is distributed under the terms of the Creative Commons Attribution License CC-BY. This checklist was completed on 04. August 2023 using <https://www.goodreports.org/>, a tool made by the [EQUATOR Network](#) in collaboration with [Penelope.ai](#)

## **Supplementary File 2: Search strategy**

### **Medline (1946 to 28 July 2022)**

|   |                                |
|---|--------------------------------|
| 1 | mycobacterium tuberculosis.tw. |
| 2 | tuberculous.tw.                |
| 3 | peritonitis.tw                 |
| 4 | peritoneal dialysis.tw.        |
| 5 | 1 or 2                         |
| 6 | 3 and 4                        |
| 7 | 5 and 6                        |

### **Scopus**

{peritonitis} AND “mycobacterium tubercul\*” OR “tubercul\*” AND {peritoneal dialysis}

### **Embase (1947 to July 2022)**

{peritonitis} AND {peritoneal dialysis} AND “mycobacterium tubercul\*” AND “tuberculo\*”

### **Cochrane (01/01/1948 to 28/07/2022)**

“Mycobacterium tubercul\*” OR “tuberculous” AND “peritonitis” AND “peritoneal dialysis”

### **ClinicalTrials.gov**

“tuberculous, peritoneal”

### **Google scholar (1947 to July 2022)**

“Peritonitis” AND “peritoneal dialysis” AND “mycobacterium tuberculosis” AND “tuberculous”

**Supplementary Table S1:** Patient characteristics with tuberculous peritonitis in patients on PD- *Case studies*

| Patient no. | Author/year of publication                 | Country of publication | Age/Gender | PD modality  | Primary kidney disease                     | Time (in months) from PD start date to tuberculous peritonitis | Additional risk factors for tuberculous peritonitis                                                                   | Name of initial antibiotic regimen <sup>a</sup>                        | Name of antituberculosis regimen <sup>a</sup>                                                                                                        | Duration (in months) of antituberculosis treatment | Was PD catheter removed <sup>c</sup> ? (Yes/No) | Short-term outcome       |
|-------------|--------------------------------------------|------------------------|------------|--------------|--------------------------------------------|----------------------------------------------------------------|-----------------------------------------------------------------------------------------------------------------------|------------------------------------------------------------------------|------------------------------------------------------------------------------------------------------------------------------------------------------|----------------------------------------------------|-------------------------------------------------|--------------------------|
| 1           | Khanna <i>et al.</i> <sup>(S1)</sup> /1980 | Canada                 | 47/M       | CAPD         | Unknown etiology                           | Not reported                                                   | Steroids from kidney transplant, lost 25kg in the previous 2 months (malnourishment), active miliary TB (from biopsy) | Cloxacillin + tobramycin                                               | Rifampicin 600mg/day + isoniazid 300mg/day + ethambutol 900mg on alternate days, with an additional 300mg at the end of HD                           | N/A <sup>b</sup>                                   | Yes                                             | Died                     |
| 2           | Khanna <i>et al.</i> <sup>(S1)</sup> /1980 | Canada                 | 33/M       | CAPD         | Mesangial proliferative glomerulonephritis | 12                                                             | Racial origin from TB endemic region (Pakistan)                                                                       | Cephalothin sodium + tobramycin                                        | Rifampicin 600mg/day + isoniazid 300mg/day + ethambutol 400mg/day + a course of IM streptomycin 1g initially and 0.5g after each dialysis for 1 week | Not reported                                       | Yes                                             | Alive; transferred to HD |
| 3           | MacCormick <sup>(S2)</sup> /1980           | New Zealand            | 42/M       | CAPD         | Not reported                               | 12                                                             | Steroids from kidney transplant, active pulmonary TB on CXR                                                           | Ampicillin + cloxacillin + gentamicin                                  | Isoniazid + rifampicin + ethambutol                                                                                                                  | Not reported                                       | Yes                                             | Alive                    |
| 4           | Morford <sup>(S3)</sup> /1981              | USA                    | 56/M       | CAPD         | Hypertensive nephrosclerosis               | 5                                                              | Pulmonary TB from autopsy                                                                                             | Cefazolin                                                              | Isoniazid + rifampicin                                                                                                                               | N/A <sup>b</sup>                                   | Yes                                             | Died                     |
| 5           | Morford <sup>(S3)</sup> /1981              | USA                    | 55/F       | APD          | Hypertensive nephrosclerosis               | 1                                                              | Positive PPD test 4 months prior <sup>d</sup>                                                                         | IM cefazolin 1g with 120mg in each 2L PD bag + vancomycin + gentamicin | Isoniazid + rifampicin                                                                                                                               | Not reported                                       | Yes                                             | Alive; transferred to HD |
| 6           | Holley <i>et al.</i> <sup>(S4)</sup> /1982 | USA                    | 48/M       | APD          | Interstitial nephritis                     | 9                                                              | Positive PPD test 20 years ago <sup>d</sup>                                                                           | Clindamycin + tobramycin                                               | Isoniazid + ethambutol + streptomycin                                                                                                                | N/A <sup>b</sup>                                   | Yes                                             | Died                     |
| 7           | Holley <i>et al.</i> <sup>(S4)</sup> /1982 | USA                    | 54/M       | Not reported | Proliferative glomerulonephritis           | 16                                                             | Positive PPD test 1 year ago <sup>d</sup>                                                                             | IP cephalirin + PO cephalixin                                          | N/A; died before <i>M. tuberculosis</i> was identified                                                                                               | N/A <sup>b</sup>                                   | Yes                                             | Died                     |



| Patient no. | Author/year of publication                   | Country of publication | Age/Gender | PD modality  | Primary kidney disease       | Time (in months) from PD start date to tuberculous peritonitis | Additional risk factors for tuberculous peritonitis                                                     | Name of initial antibiotic regimen <sup>a</sup>                                                                                    | Name of antituberculosis regimen <sup>a</sup>                                   | Duration (in months) of antituberculosis treatment | Was PD catheter removed <sup>c</sup> ? (Yes/No) | Short-term outcome                                   |
|-------------|----------------------------------------------|------------------------|------------|--------------|------------------------------|----------------------------------------------------------------|---------------------------------------------------------------------------------------------------------|------------------------------------------------------------------------------------------------------------------------------------|---------------------------------------------------------------------------------|----------------------------------------------------|-------------------------------------------------|------------------------------------------------------|
| 8           | Holley <i>et al.</i> <sup>(54)</sup> /1982   | USA                    | 55/M       | Not reported | Diabetic nephropathy         | 24                                                             | Previous pulmonary TB on CXR 2 years ago; positive PPD test 1 year ago <sup>d</sup> ; diabetes mellitus | Cephapirin                                                                                                                         | Isoniazid 300mg/day + rifampicin 600mg/day                                      | N/A <sup>b</sup>                                   | No                                              | Died                                                 |
| 9           | Kluge <sup>(55)</sup> /1983                  | USA                    | 54/F       | CAPD         | Polycystic kidney disease    | 13                                                             | Possible pulmonary TB (CXR infiltrates)                                                                 | Not reported                                                                                                                       | Parenteral: Isoniazid + streptomycin<br>PO: Isoniazid + rifampicin + ethambutol | Not reported                                       | Yes                                             | Alive                                                |
| 10          | McKerrow and Neale <sup>(56)</sup> /1983     | New Zealand            | 53/F       | CAPD         | Chronic glomerulonephritis   | 2                                                              | Positive Mantoux test                                                                                   | IP cephadrine then vancomycin                                                                                                      | Isoniazid + rifampicin + ethambutol                                             | N/A <sup>b</sup>                                   | No                                              | Died                                                 |
| 11          | McKerrow and Neale <sup>(56)</sup> /1983     | New Zealand            | 56/F       | CAPD         | Reflux nephropathy           | 1                                                              | Positive Mantoux test                                                                                   | None                                                                                                                               | Isoniazid 300mg + rifampicin 450mg + ethambutol 400mg                           | Not reported                                       | Yes                                             | Alive; returned to PD 1 month after catheter removal |
| 12          | McKerrow and Neale <sup>(56)</sup> /1983     | New Zealand            | 43/M       | CAPD         | Chronic glomerulonephritis   | 4                                                              | Systemic TB diagnosed 5 years ago <sup>d</sup> and failed renal transplant 3 years ago                  | Antibiotics for prior bacterial peritonitis for <i>Staphylococcal</i> peritonitis two weeks ago                                    | Isoniazid 300mg + rifampicin 450mg + ethambutol 500mg                           | Not reported                                       | Yes                                             | Alive; returned to PD 6 weeks after catheter removal |
| 13          | Cuss <i>et al.</i> <sup>(57)</sup> /1986     | UK                     | 55/M       | CAPD         | Hypertensive nephrosclerosis | 3                                                              | Racial origin from endemic region (India)                                                               | Not reported                                                                                                                       | Isoniazid + rifampicin, pyrazinamide                                            | N/A <sup>b</sup>                                   | Not reported                                    | Died                                                 |
| 14          | Ludlam <i>et al.</i> <sup>(58)</sup> /1986   | UK                     | 51/M       | CAPD         | Diabetic nephropathy         | 12                                                             | Racial origin from endemic region (India); diabetes mellitus                                            | <i>First regimen:</i><br>vancomycin + ceftazidime<br><br><i>Second regimen:</i><br>IP amikacin 20mg/L + PO doxycycline 100mg/daily | Isoniazid 300mg/day + rifampicin 600mg/day                                      | N/A <sup>b</sup>                                   | No                                              | Died                                                 |
| 15          | Vathsala <i>et al.</i> <sup>(59)</sup> /1987 | Singapore              | 54/F       | CAPD         | Hypertensive nephrosclerosis | 6                                                              | Healed inactive pulmonary TB                                                                            | Not reported                                                                                                                       | Isoniazid 300mg/day + rifampicin 450mg/day + ethambutol 300mg/day               | Not reported                                       | No                                              | Alive                                                |
| 16          | Yorioka <i>et al.</i> <sup>(510)</sup> /1988 | Japan                  | 61/F       | CAPD         | Chronic glomerulonephritis   | 4                                                              | Positive Mantoux test                                                                                   | Cefoperazone + tobramycin                                                                                                          | Rifampicin + streptomycin + isoticotinic acid hydrazide                         | Not reported                                       | Yes                                             | Alive                                                |

| Patient no. | Author/year of publication                       | Country of publication | Age/Gen der | PD modality | Primary kidney disease       | Time (in months) from PD start date to tuberculous peritonitis | Additional risk factors for tuberculous peritonitis                                        | Name of initial antibiotic regimen <sup>a</sup>                               | Name of antituberculosis regimen <sup>a</sup> | Duration (in months) of antituberculosis treatment | Was PD catheter removed <sup>c</sup> ? (Yes/No) | Short-term outcome       |
|-------------|--------------------------------------------------|------------------------|-------------|-------------|------------------------------|----------------------------------------------------------------|--------------------------------------------------------------------------------------------|-------------------------------------------------------------------------------|-----------------------------------------------|----------------------------------------------------|-------------------------------------------------|--------------------------|
| 17          | Cheng <i>et al.</i> <sup>(S11)</sup> /1989       | Hong Kong              | 47/F        | APD         | Recurrent nephrolithiasis    | 36                                                             | Originate from high TB incidence country (Hong Kong)                                       | PO cephradine + metronidazole + IP aminoglycosides + cephalothin + cefuroxime | Isoniazid + rifampicin + streptomycin         | N/A <sup>b</sup>                                   | Yes                                             | Died                     |
| 18          | Cheng <i>et al.</i> <sup>(S11)</sup> /1989       | Hong Kong              | 33/M        | CAPD        | Bilateral contracted kidney  | 12                                                             | Originate from high TB incidence country (Hong Kong)                                       | IP tobramycin + PO ofloxacin                                                  | Isoniazid + rifampicin + pyrazinamide         | 12                                                 | Yes                                             | Alive; transferred to HD |
| 19          | Cheng <i>et al.</i> <sup>(S11)</sup> /1989       | Hong Kong              | 24/M        | CAPD        | Hypertensive nephrosclerosis | 60                                                             | Originate from high TB incidence country (Hong Kong)                                       | IP gentamicin + cephalothin                                                   | Isoniazid + rifampicin + pyrazinamide         | Not reported                                       | Yes                                             | Alive; transferred to HD |
| 20          | Cheng <i>et al.</i> <sup>(S11)</sup> /1989       | Hong Kong              | 61/F        | CAPD        | Bilateral contracted kidney  | 5                                                              | Originate from high TB incidence country (Hong Kong); positive Mantoux test                | Not reported                                                                  | Isoniazid + rifampicin + pyrazinamide         | Not reported                                       | No                                              | Alive; remained on PD    |
| 21          | Cheng <i>et al.</i> <sup>(S11)</sup> /1989       | Hong Kong              | 42/F        | APD         | Unknown etiology             | 12                                                             | Positive Mantoux test                                                                      | Not reported                                                                  | Isoniazid + rifampicin + pyrazinamide         | 14                                                 | No                                              | Alive; remained on PD    |
| 22          | Baumgartner <i>et al.</i> <sup>(S12)</sup> /1989 | USA                    | 47/M        | CAPD        | Heroin abuse                 | 48                                                             | HIV & on pyrimethamine, sulfadiazine and dexamethasone for presumed cerebral toxoplasmosis | IP tobramycin + IP vancomycin                                                 | Isoniazid + rifampicin                        | Not reported                                       | No                                              | Died                     |
| 23          | Mallat and Brensilver <sup>(S13)</sup> /1989     | USA                    | 54/M        | CAPD        | Not reported                 | 3                                                              | Unknown                                                                                    | IP tobramycin + IP vancomycin                                                 | Isoniazid + rifampicin                        | 12                                                 | No                                              | Alive                    |
| 24          | Lye <i>et al.</i> <sup>(S14)</sup> /1990         | Singapore              | 57/F        | CAPD        | Chronic glomerulonephritis   | 8                                                              | Not reported                                                                               | IP vancomycin + IP gentamicin                                                 | Isoniazid + rifampicin + pyrazinamide         | Not reported                                       | Yes                                             | Not reported             |
| 25          | Ahijado <i>et al.</i> <sup>(S15)</sup> /1991     | Spain                  | 34/M        | CAPD        | Diabetic nephropathy         | 42                                                             | Diabetes mellitus                                                                          | Not reported                                                                  | Isoniazid + rifampicin + ethambutol           | Not reported                                       | Yes                                             | Alive; returned to PD    |
| 26          | Ahijado <i>et al.</i> <sup>(S15)</sup> /1991     | Spain                  | 52/M        | CAPD        | Chronic glomerulonephritis   | 13                                                             | Unknown                                                                                    | Not reported                                                                  | N/A; Died                                     | N/A <sup>b</sup>                                   | Yes                                             | Died                     |
| 27          | Ahijado <i>et al.</i> <sup>(S15)</sup> /1991     | Spain                  | 55/M        | CAPD        | Diabetic nephropathy         | 7                                                              | Diabetes mellitus; presence of <i>M. tuberculosis spp.</i> in the urine sample             | Not reported                                                                  | Isoniazid + rifampicin + ethambutol           | Not reported                                       | Yes                                             | Alive; transferred to HD |

| Patient no. | Author/year of publication                        | Country of publication | Age/Gender | PD modality  | Primary kidney disease       | Time (in months) from PD start date to tuberculous peritonitis | Additional risk factors for tuberculous peritonitis                         | Name of initial antibiotic regimen <sup>a</sup>        | Name of antituberculosis regimen <sup>a</sup>       | Duration (in months) of antituberculosis treatment | Was PD catheter removed <sup>c</sup> ? (Yes/No) | Short-term outcome       |
|-------------|---------------------------------------------------|------------------------|------------|--------------|------------------------------|----------------------------------------------------------------|-----------------------------------------------------------------------------|--------------------------------------------------------|-----------------------------------------------------|----------------------------------------------------|-------------------------------------------------|--------------------------|
| 28          | Ahijado <i>et al.</i> <sup>(S15)</sup> /1991      | Spain                  | 63/F       | CAPD         | Diabetic nephropathy         | 38                                                             | Diabetes mellitus                                                           | Not reported                                           | Isoniazid + rifampicin                              | Not reported                                       | Yes                                             | Alive; returned to PD    |
| 29          | Tan <i>et al.</i> <sup>(S16)</sup> /1991          | USA                    | 37/M       | CAPD         | Hypertensive nephrosclerosis | 4                                                              | HIV                                                                         | Not reported                                           | Isoniazid + rifampicin + pyrazinamide               | Not reported                                       | No                                              | Alive; remained on PD    |
| 30          | Tan <i>et al.</i> <sup>(S16)</sup> /1991          | USA                    | 58/F       | Not reported | Diabetic nephropathy         | 10                                                             | Pulmonary TB on CT                                                          | Vancomycin + gentamicin                                | Isoniazid + rifampicin                              | N/A <sup>b</sup>                                   | No                                              | Died                     |
| 31          | Tan <i>et al.</i> <sup>(S16)</sup> /1991          | USA                    | 77/M       | CAPD         | Hypertensive nephrosclerosis | 2                                                              | Positive Mantoux test                                                       | Not reported                                           | Isoniazid + rifampicin                              | Not reported                                       | No                                              | Alive                    |
| 32          | Kwan <i>et al.</i> <sup>(S17)</sup> /1991         | UK                     | M          | CAPD         | Chronic glomerulonephritis   | 11                                                             | Racial origin from endemic region (Pakistan/India); cerebral and miliary TB | Not reported                                           | Isoniazid 100-200mg/day + rifampicin + pyrazinamide | 12                                                 | Yes                                             | Alive; transferred to HD |
| 33          | Kwan <i>et al.</i> <sup>(S17)</sup> /1991         | UK                     | F          | CAPD         | Hypertensive nephrosclerosis | 4                                                              | Previous pulmonary TB; Racial origin from endemic region (Pakistan/India)   | Not reported                                           | Isoniazid 100-200mg/day + rifampicin + pyrazinamide | 10                                                 | Yes                                             | Alive; remained on PD    |
| 34          | Kwan <i>et al.</i> <sup>(S17)</sup> /1991         | UK                     | F          | CAPD         | Radiation nephritis          | 15                                                             | Racial origin from endemic region (Pakistan/India)                          | Not reported                                           | No treatment                                        | N/A <sup>b</sup>                                   | N/A                                             | Died                     |
| 35          | Kwan <i>et al.</i> <sup>(S17)</sup> /1991         | UK                     | F          | CAPD         | Chronic glomerulonephritis   | 12                                                             | Racial origin from endemic region (Pakistan/India)                          | Not reported                                           | No treatment                                        | N/A <sup>b</sup>                                   | N/A                                             | Died                     |
| 36          | Ong <i>et al.</i> <sup>(S18)</sup> /1992          | UK                     | 63/M       | CAPD         | Unknown etiology             | Not reported                                                   | Racial origin from endemic region (India)                                   | Not reported                                           | Isoniazid + rifampicin + ethambutol + pyrazinamide  | 12                                                 | Yes                                             | Alive                    |
| 37          | Ong <i>et al.</i> <sup>(S18)</sup> /1992          | UK                     | 57/F       | CAPD         | Unknown etiology             | 60                                                             | Racial origin from endemic region (India)                                   | Not reported                                           | Isoniazid + rifampicin + ethambutol + pyrazinamide  | 12                                                 | Yes                                             | Alive; transferred to HD |
| 38          | Ong <i>et al.</i> <sup>(S18)</sup> /1992          | UK                     | 70/M       | CAPD         | Polycystic kidney disease    | 132                                                            | Racial origin from endemic region (India)                                   | Vancomycin + netilmicin + fluconazole                  | Isoniazid + rifampicin + ethambutol + pyrazinamide  | N/A <sup>b</sup>                                   | Yes                                             | Died                     |
| 39          | Perez Fontan <i>et al.</i> <sup>(S19)</sup> /1992 | Spain                  | 60/M       | CAPD         | Nephroangiosclerosis         | 15                                                             | Unknown                                                                     | IP ciprofloxacin 50mg/L                                | No treatment                                        | N/A <sup>b</sup>                                   | No                                              | Died                     |
| 40          | Perez Fontan <i>et al.</i> <sup>(S19)</sup> /1992 | Spain                  | 66/M       | CAPD         | Diabetic nephropathy         | 9                                                              | Diabetes mellitus                                                           | IV vancomycin + IP ciprofloxacin 50mg/L                | Isoniazid + rifampicin + ethambutol                 | N/A <sup>b</sup>                                   | No                                              | Died                     |
| 41          | Cebrian <i>et al.</i> <sup>(S20)</sup> /1992      | Spain                  | 50/M       | CAPD         | Nephroangiosclerosis         | 18                                                             | Unknown                                                                     | IM ceftazidime 1g/day + IM amikacin 500mg every 2 days | Isoniazid + rifampicin + ethambutol                 | N/A <sup>b</sup>                                   | Yes                                             | Died                     |

| Patient no. | Author/year of publication                   | Country of publication | Age/Gender | PD modality | Primary kidney disease                  | Time (in months) from PD start date to tuberculous peritonitis | Additional risk factors for tuberculous peritonitis                                                         | Name of initial antibiotic regimen <sup>a</sup>         | Name of antituberculosis regimen <sup>a</sup>                                                    | Duration (in months) of antituberculosis treatment | Was PD catheter removed? <sup>c</sup> (Yes/No) | Short-term outcome    |
|-------------|----------------------------------------------|------------------------|------------|-------------|-----------------------------------------|----------------------------------------------------------------|-------------------------------------------------------------------------------------------------------------|---------------------------------------------------------|--------------------------------------------------------------------------------------------------|----------------------------------------------------|------------------------------------------------|-----------------------|
| 42          | Mousson <i>et al.</i> <sup>(S21)</sup> /1993 | France                 | 69/F       | CAPD        | Hypertensive nephrosclerosis            | 2                                                              | Unknown                                                                                                     | Not reported                                            | Isoniazid 300mg/day + rifampicin 600mg/day + ethambutol 250mg/day                                | Not reported                                       | No                                             | Alive                 |
| 43          | Tsai <i>et al.</i> <sup>(S22)</sup> /1994    | Taiwan                 | 13/F       | CAPD        | Reflux nephropathy & neurogenic bladder | 12                                                             | Close contact with family member with active pulmonary TB                                                   | IP vancomycin + netilmicin                              | IP streptomycin 1g once dose + isoniazid 300mg/day + rifampicin 450mg/day + ethambutol 400mg/day | Not reported                                       | No                                             | Alive                 |
| 44          | Aguirre <i>et al.</i> <sup>(S23)</sup> /1994 | Spain                  | 71/M       | CAPD        | Unknown etiology                        | 12                                                             | Retroperitoneal osteomyelitic tuberculous abscess at the lumbosacral level                                  | Vancomycin + amikacin                                   | Isoniazid + rifampicin + pyrazinamide                                                            | Not reported                                       | No                                             | Alive                 |
| 45          | Ha <i>et al.</i> <sup>(S24)</sup> /1995      | Korea                  | 60/F       | CAPD        | Diabetic nephropathy                    | 12                                                             | Diabetes mellitus; malnourishment; tuberculous pseudocyst; originate from high TB incidence country (Korea) | Cefazolin 250mg + tobramycin 20mg in each bag           | Isoniazid + rifampicin + ethambutol                                                              | 12                                                 | Yes, PD catheter removed and replaced          | Alive                 |
| 46          | Herrera <i>et al.</i> <sup>(S25)</sup> /1996 | Spain                  | 75/F       | CAPD        | Tubulointerstitial nephropathy          | Not reported                                                   | Unknown                                                                                                     | Tobramycin + vancomycin                                 | Isoniazid 300mg/day + rifampicin 600mg/day + ethambutol 1200mg every 48 days                     | Not reported                                       | Yes                                            | Alive                 |
| 47          | Huang <i>et al.</i> <sup>(S26)</sup> /1996   | Taiwan                 | 62/F       | APD         | Diabetic nephropathy                    | 48                                                             | Diabetes mellitus                                                                                           | Cefazolin + tobramycin                                  | Isoniazid + rifampicin + ethambutol + pyrazinamide                                               | N/A <sup>b</sup>                                   | Yes                                            | Died                  |
| 48          | Lui <i>et al.</i> <sup>(S27)</sup> /1996     | Hong Kong              | 60/F       | CAPD        | Not reported                            | 5                                                              | Originate from high TB incidence country (Hong Kong)                                                        | IP cefuroxime + tobramycin; or IP vancomycin + amikacin | Isoniazid + rifampicin + pyrazinamide                                                            | 9-12                                               | No                                             | Alive; remained on PD |
| 49          | Lui <i>et al.</i> <sup>(S27)</sup> /1996     | Hong Kong              | 24/F       | CAPD        | Not reported                            | 4                                                              | Originate from high TB incidence country (Hong Kong)                                                        | IP cefuroxime + tobramycin; or IP vancomycin + amikacin | Isoniazid + rifampicin + pyrazinamide                                                            | 9-12                                               | No                                             | Alive; remained on PD |
| 50          | Lui <i>et al.</i> <sup>(S27)</sup> /1996     | Hong Kong              | 61/M       | CAPD        | Not reported                            | 57                                                             | Originate from high TB incidence country (Hong Kong); diabetes mellitus                                     | IP cefuroxime + tobramycin; or IP vancomycin + amikacin | Isoniazid + rifampicin + pyrazinamide                                                            | 9-12                                               | N/A                                            | Died                  |

| Patient no. | Author/year of publication                     | Country of publication | Age/Gender | PD modality | Primary kidney disease       | Time (in months) from PD start date to tuberculous peritonitis | Additional risk factors for tuberculous peritonitis                  | Name of initial antibiotic regimen <sup>a</sup>         | Name of antituberculosis regimen <sup>a</sup>                                                       | Duration (in months) of antituberculosis treatment | Was PD catheter removed <sup>c</sup> ? (Yes/No)                                | Short-term outcome       |
|-------------|------------------------------------------------|------------------------|------------|-------------|------------------------------|----------------------------------------------------------------|----------------------------------------------------------------------|---------------------------------------------------------|-----------------------------------------------------------------------------------------------------|----------------------------------------------------|--------------------------------------------------------------------------------|--------------------------|
| 51          | Lui <i>et al.</i> <sup>(S27)</sup> /1996       | Hong Kong              | 60/F       | CAPD        | Not reported                 | 2                                                              | Originate from high TB incidence country (Hong Kong), malnourishment | IP cefuroxime + tobramycin; or IP vancomycin + amikacin | Isoniazid + rifampicin + pyrazinamide                                                               | 9-12                                               | N/A                                                                            | Died                     |
| 52          | Lui <i>et al.</i> <sup>(S27)</sup> /1996       | Hong Kong              | 35/F       | CAPD        | Not reported                 | 2                                                              | Originate from high TB incidence country (Hong Kong)                 | IP cefuroxime + tobramycin; or IP vancomycin + amikacin | Isoniazid + rifampicin + pyrazinamide                                                               | 9-12                                               | No                                                                             | Alive; remained on PD    |
| 53          | Lui <i>et al.</i> <sup>(S27)</sup> /1996       | Hong Kong              | 58/F       | CAPD        | Not reported                 | 6                                                              | Originate from high TB incidence country (Hong Kong)                 | IP cefuroxime + tobramycin; or IP vancomycin + amikacin | Isoniazid + rifampicin + pyrazinamide                                                               | 9-12                                               | Yes, due to ultrafiltration failure after 3 months of antituberculosis therapy | Alive; transferred to HD |
| 54          | Lui <i>et al.</i> <sup>(S27)</sup> /1996       | Hong Kong              | 35/F       | CAPD        | Not reported                 | 60                                                             | Originate from high TB incidence country (Hong Kong)                 | IP cefuroxime + tobramycin; or IP vancomycin + amikacin | Isoniazid + rifampicin + pyrazinamide                                                               | 9-12                                               | No                                                                             | Alive; remained on CAPD  |
| 55          | Lui <i>et al.</i> <sup>(S27)</sup> /1996       | Hong Kong              | 47/M       | CAPD        | Not reported                 | 7                                                              | Originate from high TB incidence country (Hong Kong)                 | IP cefuroxime + tobramycin; or IP vancomycin + amikacin | Isoniazid + rifampicin + pyrazinamide                                                               | 9-12                                               | No                                                                             | Alive; remained on CAPD  |
| 56          | Lui <i>et al.</i> <sup>(S27)</sup> /1996       | Hong Kong              | 40/M       | CAPD        | Not reported                 | 31                                                             | Originate from high TB incidence country (Hong Kong)                 | IP cefuroxime + tobramycin; or IP vancomycin + amikacin | Isoniazid + rifampicin + pyrazinamide                                                               | 9-12                                               | No                                                                             | Alive; remained on CAPD  |
| 57          | Lui <i>et al.</i> <sup>(S27)</sup> /1996       | Hong Kong              | 33/M       | CAPD        | Not reported                 | 7                                                              | Originate from high TB incidence country (Hong Kong)                 | IP cefuroxime + tobramycin; or IP vancomycin + amikacin | Isoniazid + rifampicin + pyrazinamide                                                               | 9-12                                               | Yes, due to ultrafiltration failure after 3 months of antituberculosis therapy | Alive; transferred to HD |
| 58          | Yoshitake <i>et al.</i> <sup>(S28)</sup> /1998 | Japan                  | 73/M       | CAPD        | Hypertensive nephrosclerosis | 36                                                             | Unknown                                                              | Not reported                                            | Isoniazid 300mg/day + streptomycin 500mg every 3 days + rifampicin 450mg/day + ethambutol 500mg/day | N/A <sup>b</sup>                                   | Yes, before <i>M. tuberculosis</i> was identified                              | Died                     |
| 59          | Dogukan <i>et al.</i> <sup>(S29)</sup> /1998   | Turkey                 | 45/F       | CAPD        | Hypertensive nephrosclerosis | 7                                                              | Unknown                                                              | IP vancomycin 2g/week + IP amikacin 120mg/day           | Isoniazid + rifampicin + ethambutol + pyrazinamide                                                  | Not reported                                       | No                                                                             | Alive                    |

| Patient no. | Author/year of publication                     | Country of publication | Age/Gender | PD modality | Primary kidney disease | Time (in months) from PD start date to tuberculous peritonitis | Additional risk factors for tuberculous peritonitis                                                                                                                                                        | Name of initial antibiotic regimen <sup>a</sup> | Name of antituberculosis regimen <sup>a</sup>                                | Duration (in months) of antituberculosis treatment | Was PD catheter removed <sup>c</sup> ? (Yes/No)                            | Short-term outcome                               |
|-------------|------------------------------------------------|------------------------|------------|-------------|------------------------|----------------------------------------------------------------|------------------------------------------------------------------------------------------------------------------------------------------------------------------------------------------------------------|-------------------------------------------------|------------------------------------------------------------------------------|----------------------------------------------------|----------------------------------------------------------------------------|--------------------------------------------------|
| 60          | Prakash <sup>(S30)</sup> /1999                 | India                  | 24/M       | CAPD        | Not reported           | 3                                                              | Racial origin of the endemic region (India), pulmonary TB and receiving antituberculosis regimen, previous use of steroids for kidney transplant prior to the rejection 3 months before initiation on CAPD | IP vancomycin + IP ceftazidime                  | Isoniazid + rifampicin + ofloxacin + pyrazinamide                            | Not reported                                       | Yes, after positive acid-fast bacilli                                      | Alive; received kidney transplant after 2 months |
| 61          | Prakash <sup>(S30)</sup> /1999                 | India                  | 62/M       | CAPD        | Diabetic nephropathy   | 3                                                              | Racial origin of the endemic region (India), diabetes mellitus                                                                                                                                             | IP vancomycin + IP ceftazidime                  | Isoniazid + rifampicin + ethambutol + pyrazinamide                           | N/A <sup>b</sup>                                   | Yes, after positive acid-fast bacilli                                      | Died                                             |
| 62          | Talwani <i>et al.</i> <sup>(S31)</sup> /2000   | USA                    | 37/M       | CAPD        | Diabetic nephropathy   | 6                                                              | Unknown                                                                                                                                                                                                    | Not reported                                    | Isoniazid + rifampicin + ethambutol + pyrazinamide                           | 9                                                  | Yes, after <i>Candida tropicalis</i> was identified on Day 35 of admission | Alive; transferred to HD                         |
| 63          | Quantrill <i>et al.</i> <sup>(S32)</sup> /2001 | UK                     | 59/F       | CAPD        | Diabetic nephropathy   | 12                                                             | Racial origin from endemic region (India), diabetes mellitus                                                                                                                                               | Not reported                                    | Isoniazid 200-300mg/day + rifampicin 450-600mg/day + pyrazinamide 1.5-2g/day | 6-12                                               | No                                                                         | Alive; remained on PD                            |
| 64          | Quantrill <i>et al.</i> <sup>(S32)</sup> /2001 | UK                     | 58/M       | CAPD        | Chronic pyelonephritis | 12                                                             | Racial origin from endemic region (India)                                                                                                                                                                  | Not reported                                    | Isoniazid 200-300mg/day + rifampicin 450-600mg/day + pyrazinamide 1.5-2g/day | 6-12                                               | Yes                                                                        | Died                                             |
| 65          | Quantrill <i>et al.</i> <sup>(S32)</sup> /2001 | UK                     | 58/F       | CAPD        | Diabetic nephropathy   | 16                                                             | Racial origin from endemic region (India), diabetes mellitus                                                                                                                                               | Not reported                                    | Isoniazid 200-300mg/day + rifampicin 450-600mg/day + pyrazinamide 1.5-2g/day | 6-12                                               | Yes                                                                        | Alive                                            |

| Patient no. | Author/year of publication                     | Country of publication | Age/Gender | PD modality | Primary kidney disease              | Time (in months) from PD start date to tuberculous peritonitis | Additional risk factors for tuberculous peritonitis                                                                  | Name of initial antibiotic regimen <sup>a</sup> | Name of antituberculosis regimen <sup>a</sup>                                | Duration (in months) of antituberculosis treatment | Was PD catheter removed <sup>c</sup> ? (Yes/No) | Short-term outcome |
|-------------|------------------------------------------------|------------------------|------------|-------------|-------------------------------------|----------------------------------------------------------------|----------------------------------------------------------------------------------------------------------------------|-------------------------------------------------|------------------------------------------------------------------------------|----------------------------------------------------|-------------------------------------------------|--------------------|
| 66          | Quantrill <i>et al.</i> <sup>(S32)</sup> /2001 | UK                     | 63/F       | CAPD        | Diabetic nephropathy                | 12                                                             | Racial origin from endemic region (India)                                                                            | Not reported                                    | Isoniazid 200-300mg/day + rifampicin 450-600mg/day + Pyrazinamide 1.5-2g/day | 6-12                                               | No                                              | Died               |
| 67          | Quantrill <i>et al.</i> <sup>(S32)</sup> /2001 | UK                     | 34/F       | CAPD        | Post-partum acute cortical necrosis | 63                                                             | Racial origin from endemic region (India)                                                                            | Not reported                                    | Isoniazid 200-300mg/day + rifampicin 450-600mg/day + pyrazinamide 1.5-2g/day | 6-12                                               | No                                              | Alive              |
| 68          | Quantrill <i>et al.</i> <sup>(S32)</sup> /2001 | UK                     | 36/M       | CAPD        | Unknown etiology                    | 6                                                              | Racial origin from endemic region (India)                                                                            | Not reported                                    | Isoniazid 200-300mg/day + rifampicin 450-600mg/day + pyrazinamide 1.5-2g/day | 6-12                                               | No                                              | Alive              |
| 69          | Quantrill <i>et al.</i> <sup>(S32)</sup> /2001 | UK                     | 57/M       | CAPD        | Chronic pyelonephritis              | 9                                                              | Racial origin from endemic region (oriental); maintenance prednisolone following a failed previous kidney transplant | Not reported                                    | Isoniazid 200-300mg/day + rifampicin 450-600mg/day + pyrazinamide 1.5-2g/day | 6-12                                               | No                                              | Died               |
| 70          | Quantrill <i>et al.</i> <sup>(S32)</sup> /2001 | UK                     | 73/M       | CAPD        | Renal artery stenosis               | 9                                                              | Occupational exposure to bovine TB as public health inspector of meat carcasses                                      | Not reported                                    | Isoniazid 200-300mg/day + rifampicin 450-600mg/day + pyrazinamide 1.5-2g/day | 6-12                                               | Yes                                             | Alive              |
| 71          | Gupta and Prakash <sup>(S33)</sup> /2001       | India                  | 65/M       | CAPD        | Chronic glomerulonephritis          | 4                                                              | Racial origin of the endemic region (India), active pulmonary TB                                                     | No                                              | Yes, authors did not specify the regimen                                     | N/A <sup>b</sup>                                   | No                                              | Died               |

| Patient no. | Author/year of publication                    | Country of publication | Age/Gender | PD modality | Primary kidney disease         | Time (in months) from PD start date to tuberculous peritonitis | Additional risk factors for tuberculous peritonitis                                                             | Name of initial antibiotic regimen <sup>a</sup> | Name of antituberculosis regimen <sup>a</sup>                                              | Duration (in months) of antituberculosis treatment | Was PD catheter removed <sup>c?</sup> (Yes/No)    | Short-term outcome       |
|-------------|-----------------------------------------------|------------------------|------------|-------------|--------------------------------|----------------------------------------------------------------|-----------------------------------------------------------------------------------------------------------------|-------------------------------------------------|--------------------------------------------------------------------------------------------|----------------------------------------------------|---------------------------------------------------|--------------------------|
| 72          | Abraham <i>et al.</i> <sup>(S34)</sup> /2001  | India                  | 18/M       | CAPD        | Epstein syndrome               | 16                                                             | Racial origin of the endemic region (India)                                                                     | Not reported                                    | Isoniazid + rifampicin + ethambutol + pyrazinamide                                         | 6-9                                                | Yes, co-infection with <i>Candida</i> peritonitis | Alive; transferred to HD |
| 73          | Abraham <i>et al.</i> <sup>(S34)</sup> /2001  | India                  | 55/M       | CAPD        | Diabetic nephropathy           | 2                                                              | Racial origin of the endemic region (India)                                                                     | Not reported                                    | Isoniazid + rifampicin + ethambutol                                                        | 6-9                                                | Yes                                               | Died                     |
| 74          | Abraham <i>et al.</i> <sup>(S34)</sup> /2001  | India                  | 67/F       | CAPD        | Chronic glomerulonephritis     | 14                                                             | Racial origin of the endemic region (India)                                                                     | Not reported                                    | Isoniazid+ rifampicin + streptomycin                                                       | 6-9                                                | Yes                                               | Died                     |
| 75          | Abraham <i>et al.</i> <sup>(S34)</sup> /2001  | India                  | 69/F       | CAPD        | Diabetic nephropathy           | 84                                                             | Racial origin of the endemic region (India)                                                                     | Not reported                                    | Isoniazid + rifampicin + ciprofloxacin+ pyrazinamide                                       | 6-9                                                | Yes, PD catheter removed and reinserted           | Alive; remained on PD    |
| 76          | Lui <i>et al.</i> <sup>(S35)</sup> /2002      | Hong Kong              | 43/F       | CAPD        | Lupus nephritis                | 62                                                             | High dose steroid and azathioprine for lupus reactivation, originate from high incidence TB country (Hong Kong) | Not reported                                    | Isoniazid 200mg/day + rifampicin 450mg/day + pyrazinamide 1.5gday + levofloxacin 200mg/day | 15                                                 | Not reported                                      | Alive                    |
| 77          | Lye <i>et al.</i> <sup>(S36)</sup> /2002      | Singapore              | 18/M       | CAPD        | Chronic glomerulonephritis     | 24                                                             | Unknown                                                                                                         | IP vancomycin + gentamicin                      | Not reported                                                                               | Not reported                                       | Yes, before <i>M. tuberculosis</i> was identified | Not reported             |
| 78          | Lye <i>et al.</i> <sup>(S36)</sup> /2002      | Singapore              | 50/M       | CAPD        | Diabetes mellitus              | 60                                                             | Diabetes mellitus, past history of possible TB                                                                  | IP vancomycin + gentamicin                      | Isoniazid + rifampicin + pyrazinamide + ethambutol                                         | Not reported                                       | Yes, before <i>M. tuberculosis</i> was identified | Not reported             |
| 79          | Bouraoui <i>et al.</i> <sup>(S37)</sup> /2002 | Tunisia                | 38/F       | CAPD        | Chronic glomerular nephropathy | 3                                                              | Unknown                                                                                                         | Cefotaxime + ofloxacin + fluconazole            | Isoniazid 250mg/day + rifampicin 500mg/day + pyrazinamide 600mg/day                        | Not reported                                       | No                                                | Alive; remained on PD    |
| 80          | Hung <i>et al.</i> <sup>(S38)</sup> /2003     | Taiwan                 | 42/F       | CAPD        | Not reported                   | Not reported                                                   | Past history of TB lymphadenitis                                                                                | Vancomycin + ceftazidime + metronidazole        | Isoniazid + rifampicin + pyrazinamide                                                      | 13-14                                              | Yes, before <i>M. tuberculosis</i> was identified | Alive                    |



| Patient no. | Author/year of publication                       | Country of publication | Age/Gender | PD modality | Primary kidney disease                    | Time (in months) from PD start date to tuberculous peritonitis | Additional risk factors for tuberculous peritonitis                      | Name of initial antibiotic regimen <sup>a</sup> | Name of antituberculosis regimen <sup>a</sup>           | Duration (in months) of antituberculosis treatment | Was PD catheter removed <sup>c</sup> ? (Yes/No) | Short-term outcome       |
|-------------|--------------------------------------------------|------------------------|------------|-------------|-------------------------------------------|----------------------------------------------------------------|--------------------------------------------------------------------------|-------------------------------------------------|---------------------------------------------------------|----------------------------------------------------|-------------------------------------------------|--------------------------|
| 81          | Karayaylali <i>et al.</i> <sup>(S39)</sup> /2003 | Turkey                 | 42/F       | CAPD        | Unknown etiology                          | 19                                                             | Hypoalbuminaemia (31g/L)                                                 | Vancomycin + amikacin + cefepime                | Isoniazid + rifampicin + morphazinamide                 | Not reported                                       | Yes                                             | Alive; transferred to HD |
| 82          | Karayaylali <i>et al.</i> <sup>(S39)</sup> /2003 | Turkey                 | 20/M       | CAPD        | Membranous glomerulonephritis             | 5                                                              | Unknown                                                                  | Vancomycin + amikacin + cefepime + fluconazole  | Isoniazid + rifampicin + morphazinamide                 | Not reported                                       | Yes                                             | Died                     |
| 83          | Karayaylali <i>et al.</i> <sup>(S39)</sup> /2003 | Turkey                 | 31/M       | CAPD        | Hypertensive nephrosclerosis              | 12                                                             | Hypoalbuminaemia (33g/L)                                                 | Vancomycin + amikacin + metronidazole           | Isoniazid + rifampicin + morphazinamide                 | Not reported                                       | Yes                                             | Alive; transferred to HD |
| 84          | Karayaylali <i>et al.</i> <sup>(S39)</sup> /2003 | Turkey                 | 49/M       | CAPD        | Diabetic nephropathy                      | 29                                                             | Diabetes mellitus; hypoalbuminaemia (26g/L)                              | Vancomycin + gentamicin                         | Isoniazid + rifampicin + morphazinamide + ethambutol    | Not reported                                       | No                                              | Died                     |
| 85          | Karayaylali <i>et al.</i> <sup>(S39)</sup> /2003 | Turkey                 | 45/F       | CAPD        | Hypertensive nephrosclerosis              | 7                                                              | Unknown                                                                  | Cefazolin + amikacin + vancomycin               | Isoniazid + rifampicin + ethambutol + pyrazinamide      | Not reported                                       | No                                              | Alive; remained on PD    |
| 86          | Karayaylali <i>et al.</i> <sup>(S39)</sup> /2003 | Turkey                 | 49/M       | CAPD        | Diabetic nephropathy                      | 9                                                              | Diabetes mellitus; hypoalbuminaemia (19g/L)                              | Cefazolin + amikacin                            | Isoniazid + rifampicin + morphazinamide + ethambutol    | Not reported                                       | Yes                                             | Died                     |
| 87          | Karayaylali <i>et al.</i> <sup>(S39)</sup> /2003 | Turkey                 | 36/F       | CAPD        | Chronic glomerulonephritis                | 2                                                              | Unknown                                                                  | Vancomycin + amikacin                           | Isoniazid + rifampicin + morphazinamide + ciprofloxacin | Not reported                                       | No                                              | Alive; remained on PD    |
| 88          | Karayaylali <i>et al.</i> <sup>(S39)</sup> /2003 | Turkey                 | 25/F       | CAPD        | Membrano-proliferative glomerulonephritis | 3                                                              | Immunosuppressive therapy; pulmonary liver TB; hypoalbuminaemia (25 g/L) | Not reported                                    | Isoniazid + rifampicin + ethambutol + ciprofloxacin     | Not reported                                       | Yes                                             | Died                     |
| 89          | Karayaylali <i>et al.</i> <sup>(S39)</sup> /2003 | Turkey                 | 45/M       | CAPD        | Hypertensive nephrosclerosis              | 6                                                              | Hypoalbuminaemia (27g/L)                                                 | Vancomycin + amikacin + other antibiotic        | Isoniazid + rifampicin + ethambutol + pyrazinamide      | Not reported                                       | Yes                                             | Alive; transferred to HD |
| 90          | Karayaylali <i>et al.</i> <sup>(S39)</sup> /2003 | Turkey                 | 30/F       | CAPD        | Chronic glomerulonephritis                | 40                                                             | Unknown                                                                  | Not reported                                    | Isoniazid + rifampicin + pyrazinamide                   | Not reported                                       | Yes                                             | Alive; transferred to HD |
| 91          | Johnson <i>et al.</i> <sup>(S40)</sup> /2003     | Australia              | 57/F       | CAPD        | Diabetic nephropathy                      | 4                                                              | Diabetes mellitus, hypoalbuminaemia (21g/L)                              | Vancomycin + ceftriaxone + metronidazole        | Isoniazid + rifampicin + ethambutol + pyrazinamide      | N/A <sup>b</sup>                                   | Not reported                                    | Died                     |

| Patient no. | Author/year of publication                        | Country of publication | Age/Gender | PD modality | Primary kidney disease                                | Time (in months) from PD start date to tuberculous peritonitis | Additional risk factors for tuberculous peritonitis        | Name of initial antibiotic regimen <sup>a</sup>                                    | Name of antituberculosis regimen <sup>a</sup>                                                                           | Duration (in months) of antituberculosis treatment | Was PD catheter removed <sup>c?</sup> (Yes/No)    | Short-term outcome       |
|-------------|---------------------------------------------------|------------------------|------------|-------------|-------------------------------------------------------|----------------------------------------------------------------|------------------------------------------------------------|------------------------------------------------------------------------------------|-------------------------------------------------------------------------------------------------------------------------|----------------------------------------------------|---------------------------------------------------|--------------------------|
| 92          | Malik <i>et al.</i> <sup>(S41)</sup> /2003        | Saudi Arabia           | 57/M       | APD         | Hypertensive nephrosclerosis                          | 36                                                             | Unknown                                                    | Not reported                                                                       | Isoniazid 300mg/day + rifampicin 600mg/day + ethambutol 400mg/day + pyrazinamide 1000mg/day                             | 6                                                  | Yes                                               | Alive; transferred to HD |
| 93          | Malik <i>et al.</i> <sup>(S41)</sup> /2003        | Saudi Arabia           | 71/M       | CAPD        | Diabetic nephropathy                                  | 6                                                              | Diabetes mellitus                                          | Not reported                                                                       | Isoniazid 300mg/day + rifampicin 600mg/day + ethambutol 400mg/day + pyrazinamide 1000mg/day                             | 6                                                  | No                                                | Alive; remained on PD    |
| 94          | Ogutmen <i>et al.</i> <sup>(S42)</sup> /2003      | Turkey                 | 32/M       | CAPD        | Unknown etiology                                      | Not reported                                                   | Disseminated TB                                            | Not reported                                                                       | Isoniazid 300mg/day + rifampicin 600mg/day + ethambutol 1000mg/day + pyrazinamide 1500mg/day                            | Not reported                                       | No                                                | Alive                    |
| 95          | Sahin <i>et al.</i> <sup>(S43)</sup> /2004        | Turkey                 | 36/M       | CAPD        | Not reported                                          | 4                                                              | Unknown                                                    | IV ceftazidime + IP cefazolin + IP amikacin                                        | Isoniazid + rifampicin + ethambutol + pyrazinamide                                                                      | Not reported                                       | No                                                | Alive                    |
| 96          | Vadivel <i>et al.</i> <sup>(S44)</sup> /2006      | USA                    | 62/F       | CAPD        | Diabetic nephropathy and hypertensive nephrosclerosis | 60                                                             | Racial origin of endemic region (Haiti), diabetes mellitus | IP vancomycin + IP ceftazidime                                                     | Isoniazid 300mg/day + rifampicin 600mg/day + ethambutol 1200mg every 48 hours + pyrazinamide 1500mg every alternate day | N/A <sup>b</sup>                                   | Yes, before <i>M. tuberculosis</i> was identified | Died                     |
| 97          | Canbakan <i>et al.</i> <sup>(S45)</sup> /2006     | Turkey                 | 39/M       | CAPD        | Not reported                                          | 84                                                             | Pulmonary TB                                               | Ceftriaxone                                                                        | Isoniazid 300mg/day + rifampicin 600mg/day + ethambutol 1500mg alternate day + pyrazinamide 1250mg/day                  | 6                                                  | No                                                | Alive; remained on PD    |
| 98          | Dervisoglu <i>et al.</i> <sup>(S46)</sup> /2006   | Turkey                 | 49/F       | CAPD        | Chronic glomerulonephritis                            | 15                                                             | Not reported                                               | Vancomycin                                                                         | Isoniazid + rifampicin + ethambutol + pyrazinamide                                                                      | Not reported                                       | Yes                                               | Alive                    |
| 99          | Borrajó Prol <i>et al.</i> <sup>(S47)</sup> /2009 | Spain                  | 50/F       | APD         | Hypocomplementaemic glomerulonephritis                | 60                                                             | Hypoalbuminaemia (16g/L)                                   | Imipenem + fluconazole+ isoniazid + rifampicin + pyrazinamide (started in the ICU) | Not reported                                                                                                            | Not reported                                       | Not reported                                      | Alive; remained on PD    |

| Patient no. | Author/year of publication                | Country of publication | Age/Gender | PD modality | Primary kidney disease     | Time (in months) from PD start date to tuberculous peritonitis | Additional risk factors for tuberculous peritonitis | Name of initial antibiotic regimen <sup>a</sup> | Name of antituberculosis regimen <sup>a</sup>                                                           | Duration (in months) of antituberculosis treatment | Was PD catheter removed <sup>c?</sup> (Yes/No) | Short-term outcome       |
|-------------|-------------------------------------------|------------------------|------------|-------------|----------------------------|----------------------------------------------------------------|-----------------------------------------------------|-------------------------------------------------|---------------------------------------------------------------------------------------------------------|----------------------------------------------------|------------------------------------------------|--------------------------|
| 100         | Chiu <i>et al.</i> <sup>(S48)</sup> /2011 | Taiwan                 | 71/F       | CAPD        | Diabetic nephropathy       | 48                                                             | Diabetes mellitus                                   | Not reported                                    | Isoniazid 200-300mg/day + rifampicin 450-600mg/day + ethambutol 400mg/day + pyrazinamide 750-1000mg/day | 6-12                                               | Yes                                            | Alive; transferred to HD |
| 101         | Chiu <i>et al.</i> <sup>(S48)</sup> /2011 | Taiwan                 | 62/F       | CAPD        | Chronic glomerulonephritis | 48                                                             | Unknown                                             | Not reported                                    | Isoniazid 200-300mg/day + rifampicin 450-600mg/day + ethambutol 400mg/day + pyrazinamide 750-1000mg/day | 6-12                                               | Yes                                            | Alive; transferred to HD |
| 102         | Chiu <i>et al.</i> <sup>(S48)</sup> /2011 | Taiwan                 | 71/M       | CAPD        | Chronic glomerulonephritis | 3                                                              | Pulmonary TB                                        | Not reported                                    | Isoniazid 200-300mg/day + rifampicin 450-600mg/day + ethambutol 400mg/day + pyrazinamide 750-1000mg/day | N/A <sup>b</sup>                                   | Yes                                            | Died                     |
| 103         | Chiu <i>et al.</i> <sup>(S48)</sup> /2011 | Taiwan                 | 52/M       | CAPD        | Chronic glomerulonephritis | 96                                                             | Pulmonary TB                                        | Not reported                                    | Isoniazid 200-300mg/day + rifampicin 450-600mg/day + ethambutol 400mg/day + pyrazinamide 750-1000mg/day | 6-12                                               | Yes                                            | Alive; transferred to HD |
| 104         | Chiu <i>et al.</i> <sup>(S48)</sup> /2011 | Taiwan                 | 66/F       | CAPD        | Chronic glomerulonephritis | 48                                                             | Unknown                                             | Not reported                                    | Isoniazid 200-300mg/day + rifampicin 450-600mg/day + ethambutol 400mg/day + pyrazinamide 750-1000mg/day | 6-12                                               | No                                             | Alive; remained on PD    |

| Patient no. | Author/year of publication                 | Country of publication | Age/Gender | PD modality  | Primary kidney disease             | Time (in months) from PD start date to tuberculous peritonitis | Additional risk factors for tuberculous peritonitis | Name of initial antibiotic regimen <sup>a</sup> | Name of antituberculosis regimen <sup>a</sup>                                                           | Duration (in months) of antituberculosis treatment | Was PD catheter removed <sup>c?</sup> (Yes/No) | Short-term outcome               |
|-------------|--------------------------------------------|------------------------|------------|--------------|------------------------------------|----------------------------------------------------------------|-----------------------------------------------------|-------------------------------------------------|---------------------------------------------------------------------------------------------------------|----------------------------------------------------|------------------------------------------------|----------------------------------|
| 105         | Chiu <i>et al.</i> <sup>(S48)</sup> /2011  | Taiwan                 | 55/F       | CAPD         | Chronic glomerulonephritis         | 12                                                             | TB arthritis                                        | Not reported                                    | Isoniazid 200-300mg/day + rifampicin 450-600mg/day + ethambutol 400mg/day + pyrazinamide 750-1000mg/day | 6-12                                               | No                                             | Alive; remained on PD            |
| 106         | Chiu <i>et al.</i> <sup>(S48)</sup> /2011  | Taiwan                 | 61/F       | CAPD         | Chronic glomerulonephritis         | 48                                                             | Unknown                                             | Not reported                                    | Isoniazid 200-300mg/day + rifampicin 450-600mg/day + ethambutol 400mg/day + pyrazinamide 750-1000mg/day | 6-12                                               | No                                             | Alive; remained on PD            |
| 107         | Wang <i>et al.</i> <sup>(S49)</sup> /2011  | Taiwan                 | 24/M       | CAPD         | Focal segmental glomerulonephritis | 48                                                             | Unknown                                             | IP teicoplanin + IP ceftazidime                 | Isoniazid + rifampicin + ethambutol + pyrazinamide                                                      | Not reported                                       | Yes                                            | Alive; transferred to HD         |
| 108         | Gursu <i>et al.</i> <sup>(S50)</sup> /2011 | Turkey                 | 22/M       | CAPD         | Crescentic glomerulonephritis      | 5                                                              | Unknown                                             | Not reported                                    | Isoniazid + rifampicin + ethambutol + pyrazinamide                                                      | Not reported                                       | Yes                                            | Alive; transferred to HD         |
| 109         | Tseng <i>et al.</i> <sup>(S51)</sup> /2011 | Taiwan                 | 76/M       | CAPD         | Hypertensive nephrosclerosis       | 3                                                              | Unknown                                             | IP cefazolin + tobramycin                       | Isoniazid 300mg/day + rifampicin 600mg/day + ethambutol 8mg every other day                             | N/A-patient died two months later                  | Yes                                            | Died                             |
| 110         | Waness and Shohaib <sup>(S52)</sup> /2012  | Saudi Arabia           | 54/M       | CAPD         | Diabetic nephropathy               | 24                                                             | Unknown                                             | Aminoglycoside + vancomycin +/- antifungal      | Isoniazid +rifampicin + pyrazinamide                                                                    | 9                                                  | Yes                                            | Alive; transferred to HD         |
| 111         | Waness and Shohaib <sup>(S52)</sup> /2012  | Saudi Arabia           | 57/F       | CAPD         | APKD                               | 24                                                             | Unknown                                             | Aminoglycoside + vancomycin +/- antifungal      | Isoniazid +rifampicin + pyrazinamide                                                                    | 9                                                  | Yes                                            | Alive; resumed PD after 6 months |
| 112         | Waness and Shohaib <sup>(S52)</sup> /2012  | Saudi Arabia           | 48/M       | CAPD         | Diabetic nephropathy               | 9                                                              | Diabetes mellitus                                   | Aminoglycoside + vancomycin +/- antifungal      | Isoniazid +rifampicin + pyrazinamide                                                                    | 9                                                  | Yes                                            | Alive; transferred to HD         |
| 113         | Waness and Shohaib <sup>(S52)</sup> /2012  | Saudi Arabia           | 52/M       | CAPD         | Diabetic nephropathy               | 12                                                             | Diabetes mellitus                                   | Aminoglycoside + vancomycin +/- antifungal      | Isoniazid +rifampicin + pyrazinamide                                                                    | 9                                                  | Yes                                            | Alive; transferred to HD         |
| 114         | Lin <i>et al.</i> <sup>(S53)</sup> /2014   | Taiwan                 | 44/M       | Not reported | Gouty nephropathy                  | 6                                                              | Hypoalbuminaemia (28g/L)                            | Not reported                                    | Isoniazid + rifampicin + pyrazinamide                                                                   | Not reported                                       | Yes                                            | Alive; transferred to HD         |

| Patient no. | Author/year of publication                  | Country of publication | Age/Gender        | PD modality  | Primary kidney disease       | Time (in months) from PD start date to tuberculous peritonitis | Additional risk factors for tuberculous peritonitis                                     | Name of initial antibiotic regimen <sup>a</sup>                                                                                                                         | Name of antituberculosis regimen <sup>a</sup>                                    | Duration (in months) of antituberculosis treatment | Was PD catheter removed? (Yes/No)                 | Short-term outcome                                                       |
|-------------|---------------------------------------------|------------------------|-------------------|--------------|------------------------------|----------------------------------------------------------------|-----------------------------------------------------------------------------------------|-------------------------------------------------------------------------------------------------------------------------------------------------------------------------|----------------------------------------------------------------------------------|----------------------------------------------------|---------------------------------------------------|--------------------------------------------------------------------------|
| 115         | Lin <i>et al.</i> <sup>(S53)</sup> /2014    | Taiwan                 | 49/F <sup>c</sup> | Not reported | Diabetic nephropathy         | 12                                                             | Pulmonary TB; hypoalbuminaemia (15g/L), diabetes mellitus                               | Not reported                                                                                                                                                            | Isoniazid + rifampicin + ethambutol + pyrazinamide                               | Not reported                                       | No                                                | Alive; remained on PD; recurrence tuberculous peritonitis                |
| 116         | Lin <i>et al.</i> <sup>(S53)</sup> /2014    | Taiwan                 | 50/F              | Not reported | Diabetic nephropathy         | 24                                                             | Hypoalbuminaemia (34g/L), diabetes mellitus                                             | Not reported                                                                                                                                                            | Isoniazid + rifampicin + pyrazinamide                                            | Not reported                                       | No                                                | Alive; remained on PD                                                    |
| 117         | Lin <i>et al.</i> <sup>(S53)</sup> /2014    | Taiwan                 | 71/F              | Not reported | Diabetic nephropathy         | 12                                                             | Hypoalbuminaemia (6.6g/L), diabetes mellitus                                            | Not reported                                                                                                                                                            | Isoniazid + rifampicin + pyrazinamide                                            | N/A <sup>b</sup>                                   | Died                                              | Died                                                                     |
| 118         | Iqbal <i>et al.</i> <sup>(S54)</sup> /2015  | United Kingdom         | 86/M              | CAPD         | Chronic hydronephrosis       | 18                                                             | Muscle invasive bladder cancer treated with intravesical Bacillus Calmette-Guerin (BCG) | Not reported                                                                                                                                                            | Isoniazid 250mg/day + rifampicin 600mg/day + pyrazinamide 1500mg/day for 6 weeks | N/A <sup>b</sup>                                   | Yes                                               | Died                                                                     |
| 119         | Rahal <i>et al.</i> <sup>(S55)</sup> /2015  | USA                    | 60/F              | CAPD         | Hypertensive nephrosclerosis | Not reported                                                   | Diabetes mellitus, racial origin from endemic region (India)                            | Not reported                                                                                                                                                            | Isoniazid + rifampicin + ethambutol + pyrazinamide                               | 6                                                  | Yes, before <i>M. tuberculosis</i> was identified | Alive                                                                    |
| 120         | Rahman <i>et al.</i> <sup>(S56)</sup> /2015 | Saudi Arabia           | 75/F              | Not reported | Diabetic nephropathy         | 4                                                              | Diabetes mellitus                                                                       | IP cefazolin + IP ceftazidime                                                                                                                                           | Not reported                                                                     | N/A <sup>b</sup>                                   | No                                                | Died                                                                     |
| 121         | Rohit <i>et al.</i> <sup>(S57)</sup> /2016  | India                  | 68/M              | CAPD         | Diabetic nephropathy         | 24                                                             | Diabetes mellitus, racial origin from endemic region (India)                            | <i>First regimen:</i> IP ceftazidime + IP cefazolin for 8 days<br><br><i>Second regimen:</i> IV metronidazole + IP ceftazidime + PO fluconazole 150mg on alternate days | Died before diagnosis                                                            | N/A <sup>b</sup>                                   | Yes                                               | Died                                                                     |
| 122         | Rohit <i>et al.</i> <sup>(S57)</sup> /2016  | India                  | 60/M              | Not reported | Not reported                 | Not reported                                                   | Racial origin from endemic region (India)                                               | Not reported                                                                                                                                                            | Not reported                                                                     | Not reported                                       | Yes                                               | Recurrent peritonitis with <i>coagulase negative staphylococcus spp.</i> |

| Patient no. | Author/year of publication                       | Country of publication | Age/Gender | PD modality  | Primary kidney disease                          | Time (in months) from PD start date to tuberculous peritonitis | Additional risk factors for tuberculous peritonitis                                                               | Name of initial antibiotic regimen <sup>a</sup> | Name of antituberculosis regimen <sup>a</sup>        | Duration (in months) of antituberculosis treatment | Was PD catheter removed <sup>?</sup> (Yes/No) | Short-term outcome       |
|-------------|--------------------------------------------------|------------------------|------------|--------------|-------------------------------------------------|----------------------------------------------------------------|-------------------------------------------------------------------------------------------------------------------|-------------------------------------------------|------------------------------------------------------|----------------------------------------------------|-----------------------------------------------|--------------------------|
| 123         | Rohit <i>et al.</i> <sup>(S57)</sup> /2016       | India                  | 28/F       | Not reported | Not reported                                    | Not reported                                                   | Racial origin from endemic region (India)                                                                         | Not reported                                    | Not reported                                         | Not reported                                       | No                                            | Alive                    |
| 124         | Rohit <i>et al.</i> <sup>(S57)</sup> /2016       | India                  | 57/M       | Not reported | Not reported                                    | Not reported                                                   | Racial origin from endemic region (India)                                                                         | Not reported                                    | Not reported                                         | Not reported                                       | No                                            | Died                     |
| 125         | Edwards <i>et al.</i> <sup>(S58)</sup> /2016     | UK                     | 59/F       | APD          | Bilateral small kidneys and negative immunology | 7                                                              | Racial origin from endemic region (India); positive <i>M. tuberculosis</i> culture in the lymph node concurrently | IP vancomycin + PO levofloxacin                 | Isoniazid + rifampicin + pyrazinamide + moxifloxacin | Not reported                                       | No                                            | Alive; remained on PD    |
| 126         | Edwards <i>et al.</i> <sup>(S58)</sup> /2016     | UK                     | 50/F       | APD          | Hypertensive nephrosclerosis                    | 28                                                             | Unknown                                                                                                           | IP vancomycin + PO levofloxacin                 | Isoniazid + rifampicin + pyrazinamide + moxifloxacin | Not reported                                       | No                                            | Alive; remained on PD    |
| 127         | Tamayo-Isla <i>et al.</i> <sup>(S59)</sup> /2016 | South Africa           | 45/F       | CAPD         | Autosomal dominant polycystic kidney disease    | 69.8                                                           | Racial origin from endemic region (South Africa)                                                                  | IP cefazolin + ceftazidime/gentamicin           | Not reported                                         | 9                                                  | Yes                                           | Alive; returned to PD    |
| 128         | Tamayo-Isla <i>et al.</i> <sup>(S59)</sup> /2016 | South Africa           | 30/M       | CAPD         | Obstructive uropathy                            | 30.6                                                           | Racial origin from endemic region (South Africa)                                                                  | IP cefazolin + ceftazidime/gentamicin           | Isoniazid + rifampicin + ethambutol + pyrazinamide   | 9                                                  | Yes                                           | Alive; transferred to HD |
| 129         | Tamayo-Isla <i>et al.</i> <sup>(S59)</sup> /2016 | South Africa           | 29/M       | CAPD         | Hypertensive nephrosclerosis                    | 5.6                                                            | Racial origin from endemic region (South Africa)                                                                  | IP cefazolin + ceftazidime/gentamicin           | Not reported                                         | 9                                                  | Yes                                           | Died                     |
| 130         | Tamayo-Isla <i>et al.</i> <sup>(S59)</sup> /2016 | South Africa           | 51/M       | CAPD         | Diabetic nephropathy                            | 13.4                                                           | Racial origin from endemic region (South Africa), diabetes mellitus                                               | IP cefazolin + ceftazidime/gentamicin           | Not reported                                         | 9                                                  | Yes                                           | Alive; transferred to HD |
| 131         | Tamayo-Isla <i>et al.</i> <sup>(S59)</sup> /2016 | South Africa           | 50/F       | CAPD         | Unknown                                         | 25.5                                                           | Racial origin from endemic region (South Africa)                                                                  | IP cefazolin + ceftazidime/gentamicin           | Not reported                                         | 9                                                  | Yes                                           | Died                     |
| 132         | Tamayo-Isla <i>et al.</i> <sup>(S59)</sup> /2016 | South Africa           | 34/M       | CAPD         | Hypertensive nephrosclerosis                    | 2.5                                                            | Racial origin from endemic region (South Africa)                                                                  | IP cefazolin + ceftazidime/gentamicin           | Not reported                                         | 9                                                  | Yes                                           | Died                     |
| 133         | Tamayo-Isla <i>et al.</i> <sup>(S59)</sup> /2016 | South Africa           | 28/F       | CAPD         | Diabetic nephropathy                            | 50.9                                                           | Racial origin from endemic region (South Africa), diabetes mellitus                                               | IP cefazolin + ceftazidime/gentamicin           | Not reported                                         | 9                                                  | No                                            | Died                     |
| 134         | Tamayo-Isla <i>et al.</i> <sup>(S59)</sup> /2016 | South Africa           | 37/F       | CAPD         | Unknown                                         | 8.3                                                            | Racial origin from endemic region (South Africa)                                                                  | IP cefazolin + ceftazidime/gentamicin           | Not reported                                         | 9                                                  | Yes                                           | Died                     |
| 135         | Tamayo-Isla <i>et al.</i> <sup>(S59)</sup> /2016 | South Africa           | 17/F       | CAPD         | Unknown                                         | 7.5                                                            | Racial origin from endemic region (South Africa)                                                                  | IP cefazolin + ceftazidime/gentamicin           | Not reported                                         | 9                                                  | Yes                                           | Alive; transferred to HD |

| Patient no. | Author/year of publication                          | Country of publication | Age/Gender | PD modality   | Primary kidney disease       | Time (in months) from PD start date to tuberculous peritonitis | Additional risk factors for tuberculous peritonitis                | Name of initial antibiotic regimen <sup>a</sup> | Name of antituberculosis regimen <sup>a</sup>                                                                                         | Duration (in months) of antituberculosis treatment | Was PD catheter removed <sup>?</sup> (Yes/No) | Short-term outcome       |
|-------------|-----------------------------------------------------|------------------------|------------|---------------|------------------------------|----------------------------------------------------------------|--------------------------------------------------------------------|-------------------------------------------------|---------------------------------------------------------------------------------------------------------------------------------------|----------------------------------------------------|-----------------------------------------------|--------------------------|
| 136         | Tamayo-Isla <i>et al.</i> <sup>(S59)</sup> /2016    | South Africa           | 39/M       | CAPD          | Hypertensive nephrosclerosis | 22.4                                                           | Racial origin from endemic region (South Africa)                   | IP cefazolin + ceftazidime/gentamicin           | Not reported                                                                                                                          | 9                                                  | Yes                                           | Alive; transferred to HD |
| 137         | Tamayo-Isla <i>et al.</i> <sup>(S59)</sup> /2016    | South Africa           | 41/F       | CAPD          | Hypertensive nephrosclerosis | 11.7                                                           | Racial origin from endemic region (South Africa)                   | IP cefazolin + ceftazidime/gentamicin           | Not reported                                                                                                                          | 9                                                  | Yes                                           | Died                     |
| 138         | Tamayo-Isla <i>et al.</i> <sup>(S59)</sup> /2016    | South Africa           | 24/M       | CAPD          | Unknown                      | 10.8                                                           | Racial origin from endemic region (South Africa)                   | IP cefazolin + ceftazidime/gentamicin           | Not reported                                                                                                                          | 9                                                  | Yes                                           | Alive; transferred to HD |
| 139         | Ada <i>et al.</i> <sup>(S60)</sup> /2017            | Turkey                 | 60/M       | CAPD          | Not reported                 | 5                                                              | Past history of pulmonary TB                                       | IP vancomycin + ceftazidime                     | Isoniazid + rifampicin + pyrazinamide                                                                                                 | 12                                                 | No                                            | Alive                    |
| 140         | Mogili <i>et al.</i> <sup>(S61)</sup> /2017         | India                  | 35/M       | APD           | Diabetes mellitus            | 8                                                              | Racial origin from endemic region (India)                          | Not reported                                    | Isoniazid (5mg/kg per day) + rifampicin (10mg/kg per day) + pyrazinamide (10mg/kg per day) + levofloxacin (15mg/kg per alternate day) | Not reported                                       | No                                            | Alive                    |
| 141         | De la Cruz-Temores <i>et al.</i> <sup>(S62)</sup> / | Mexico                 | 54/M       | Not reported  | Diabetes mellitus            | Not reported                                                   | Diabetes mellitus                                                  | Regimen not specified                           | Not reported                                                                                                                          | 6                                                  | Yes                                           | Alive                    |
| 142         | Patcha <i>et al.</i> <sup>(S63)</sup> /2018         | Philippines            | 42/M       | Not reported  | Diabetes mellitus            | Not reported                                                   | Racial origin from endemic region (Philippines), diabetes mellitus | IV vancomycin + IV ceftazidime                  | Isoniazid + rifampicin + ethambutol + pyrazinamide                                                                                    | 9                                                  | Yes                                           | Alive                    |
| 143         | Haikal <i>et al.</i> <sup>(S64)</sup> /2019         | Malaysia               | 40/F       | CAPD          | Hypertensive nephrosclerosis | 96                                                             | Hypoalbuminaemia (9g/L)                                            | IP cloxacillin + IP ceftazidime                 | Isoniazid + rifampicin + ethambutol + pyrazinamide                                                                                    | Not reported                                       | Yes                                           | Alive                    |
| 144         | Adriwesh <i>et al.</i> <sup>(S65)</sup> /2021       | Saudi Arabia           | 10/F       | APD           | Familial nephrotic syndrome  | 24                                                             | Racial origin from endemic region (Saudi Arabia)                   | Not reported                                    | Isoniazid + rifampicin + pyrazinamide                                                                                                 | 12                                                 | No                                            | Alive                    |
| 145         | Kurniaatmaja <i>et al.</i> <sup>(S66)</sup> /2021   | Indonesia              | 37/M       | CAPD          | Not reported                 | Not reported                                                   | Racial origin from endemic region (Indonesia)                      | Not reported                                    | Isoniazid + rifampicin + ethambutol + pyrazinamide                                                                                    | 6                                                  | Yes                                           | Alive; transferred to HD |
| 146         | Relvas <i>et al.</i> <sup>(S67)</sup> /2021         | Portugal               | 46/M       | Not specified | Hypertensive nephrosclerosis | 6                                                              | Neutropenic fever; latent TB (isoniazid was initiated)             | Vancomycin + ceftazidime + fluconazole          | Rifampicin + ethambutol + pyrazinamide + levofloxacin                                                                                 | Not reported                                       | No                                            | Alive; remained on PD    |
| 147         | Safae <i>et al.</i> <sup>(S68)</sup> /2022          | Morocco                | 50/F       | CAPD          | Lithiasic nephropathy        | 7                                                              | Originated from high TB incidence country (Morocco)                | No                                              | Isoniazid + rifampicin + ethambutol + pyrazinamide                                                                                    | Not reported                                       | No                                            | Alive; remained on PD    |
| 148         | Dassi <i>et al.</i> <sup>(S69)</sup> /2021          | India                  | 49/M       | CAPD          | Not reported                 | Not reported                                                   | Racial origin from endemic region (India)                          | Not reported                                    | Not reported                                                                                                                          | Not reported                                       | Yes                                           | Alive                    |

| Patient no. | Author/year of publication                    | Country of publication | Age/Gender | PD modality | Primary kidney disease   | Time (in months) from PD start date to tuberculous peritonitis | Additional risk factors for tuberculous peritonitis                                  | Name of initial antibiotic regimen <sup>a</sup> | Name of antituberculosis regimen <sup>a</sup>      | Duration (in months) of antituberculosis treatment | Was PD catheter removed <sup>c</sup> ? (Yes/No) | Short-term outcome       |
|-------------|-----------------------------------------------|------------------------|------------|-------------|--------------------------|----------------------------------------------------------------|--------------------------------------------------------------------------------------|-------------------------------------------------|----------------------------------------------------|----------------------------------------------------|-------------------------------------------------|--------------------------|
| 149         | Safae <i>et al.</i> <sup>(S68)</sup> /2022    | Morocco                | 45/M       | CAPD        | Undetermined nephropathy | 36                                                             | Originated from high TB incidence country (Morocco)                                  | No                                              | Isoniazid + rifampicin + ethambutol + pyrazinamide | Not reported                                       | Yes                                             | Alive; transferred to HD |
| 150         | Safae <i>et al.</i> <sup>(S68)</sup> /2022    | Morocco                | 64/M       | CAPD        | Diabetic nephropathy     | 24                                                             | Diabetes mellitus, pulmonary TB, Originated from high TB incidence country (Morocco) | No                                              | Isoniazid + rifampicin + ethambutol + pyrazinamide | Not reported                                       | No                                              | Alive; remained on PD    |
| 151         | Yuananda <i>et al.</i> <sup>(S70)</sup> /2022 | Indonesia              | 28/F       | CAPD        | Not reported             | Not reported                                                   | Racial origin from endemic region (Indonesia)                                        | None                                            | Isoniazid + rifampicin + ofloxacin + pyrazinamide  | Not reported                                       | Yes                                             | Alive; transferred to HD |

APD= automated peritoneal dialysis; CAPD= continuous ambulatory peritoneal dialysis; CXR= chest X-ray; F= female; HD= haemodialysis; HIV= human immunodeficiency virus; ICU= intensive care unit; IM= intramuscular; M= male; N/A= not applicable; PD= peritoneal dialysis; PO= oral; *M. tuberculosis*= *Mycobacterium tuberculosis*; PPD= purified protein derivative; TB= tuberculosis

<sup>a</sup> Author did not specify the dose or route of administration unless otherwise stated

<sup>b</sup> Died while receiving treatment for TB PD-associated peritonitis

<sup>c</sup> PD catheter removed due to TB PD-associated peritonitis

<sup>d</sup> Before tuberculous peritonitis was diagnosed



**Supplementary Table S2: Other patient characteristics and outcomes of patients on PD with tuberculous peritonitis- Case studies**

| Patient No. | Author/year of publication                 | Country of publication | Age/Gender | Was PD catheter removed <sup>a</sup> ? | Time (in days) of PD catheter removal from onset of symptoms <sup>b</sup> | Time (in weeks) antituberculosis therapy was started from onset of symptoms <sup>b</sup> | Concomitant <sup>c</sup> or within 4 weeks of another bacterial PD-associated peritonitis?                   | Death <sup>d</sup> (Yes/No) | Reason of death <sup>d</sup> ; duration (in days/months) after tuberculous peritonitis was diagnosed |
|-------------|--------------------------------------------|------------------------|------------|----------------------------------------|---------------------------------------------------------------------------|------------------------------------------------------------------------------------------|--------------------------------------------------------------------------------------------------------------|-----------------------------|------------------------------------------------------------------------------------------------------|
| 1           | Khanna <i>et al.</i> <sup>(S1)</sup> /1980 | Canada                 | 47/M       | Yes                                    | 7                                                                         | 6                                                                                        | No                                                                                                           | Yes                         | Disseminated TB; 1 month                                                                             |
| 2           | Khanna <i>et al.</i> <sup>(S1)</sup> /1980 | Canada                 | 33/M       | Yes                                    | 3                                                                         | 6                                                                                        | No                                                                                                           | No                          |                                                                                                      |
| 3           | McCormick <sup>(S2)</sup> /1980            | New Zealand            | 42/M       | Yes                                    | 15                                                                        | Not reported                                                                             | No                                                                                                           | No                          |                                                                                                      |
| 4           | Morford <sup>(S3)</sup> /1981              | USA                    | 56/M       | Yes                                    | 15                                                                        | 3.4                                                                                      | No                                                                                                           | Yes                         | Gastrointestinal bleeding; 8 days                                                                    |
| 5           | Morford <sup>(S3)</sup> /1981              | USA                    | 55/F       | Yes                                    | 18                                                                        | 14.5                                                                                     | No                                                                                                           | No                          |                                                                                                      |
| 6           | Holley <i>et al.</i> <sup>(S4)</sup> /1982 | USA                    | 48/M       | Yes                                    | 1                                                                         | 5.6                                                                                      | No                                                                                                           | Yes                         | Sepsis; 77 days                                                                                      |
| 7           | Holley <i>et al.</i> <sup>(S4)</sup> /1982 | USA                    | 54/M       | Yes                                    | Not reported                                                              | N/A; patient died                                                                        | No                                                                                                           | Yes                         | Tuberculous peritonitis; 33 days                                                                     |
| 8           | Holley <i>et al.</i> <sup>(S4)</sup> /1982 | USA                    | 55/M       | No                                     | -                                                                         | 8                                                                                        | Yes, <i>Proteus spp.</i>                                                                                     | Yes                         | Heart failure; 4 months                                                                              |
| 9           | Kluge <sup>(S5)</sup> /1983                | USA                    | 54/F       | Yes                                    | Not reported                                                              | Not reported                                                                             | Catheter exit-site grew gram-negative, haemolytic <i>Streptococcus</i> and <i>Staphylococcus epidermidis</i> | No                          |                                                                                                      |
| 10          | McKerrow and Neale <sup>(S6)</sup> /1983   | New Zealand            | 53/F       | No                                     | -                                                                         | 6                                                                                        | Yes, <i>Corynebacterium xerosis</i>                                                                          | Yes                         | Tuberculous peritonitis; Not reported                                                                |
| 11          | McKerrow and Neale <sup>(S6)</sup> /1983   | New Zealand            | 56/F       | Yes                                    | Not reported                                                              | Not reported                                                                             | Yes, <i>Staphylococcus epidermidis</i>                                                                       | No                          |                                                                                                      |
| 12          | McKerrow and Neale <sup>(S6)</sup> /1983   | New Zealand            | 43/M       | Yes                                    | Not reported                                                              | Not reported                                                                             | Yes, <i>Staphylococcus epidermidis</i>                                                                       | No                          |                                                                                                      |
| 13          | Cuss <i>et al.</i> <sup>(S7)</sup> /1986   | UK                     | 55/M       | Not reported                           | Not reported                                                              | Not reported                                                                             | No                                                                                                           | Yes                         | Tuberculous peritonitis; 2 weeks                                                                     |
| 14          | Ludlam <i>et al.</i> <sup>(S8)</sup> /1986 | UK                     | 51/M       | No                                     | -                                                                         | 4                                                                                        | Yes, <i>Acinetobacter lwoffii</i>                                                                            | Yes                         | Heart failure; 47 days                                                                               |

| Patient No. | Author/year of publication                       | Country of publication | Age/Gender | Was PD catheter removed <sup>a</sup> ? | Time (in days) of PD catheter removal from onset of symptoms <sup>b</sup> | Time (in weeks) antituberculosis therapy was started from onset of symptoms <sup>b</sup> | Concomitant <sup>c</sup> or within 4 weeks of another bacterial PD-associated peritonitis? | Death <sup>d</sup> (Yes/No) | Reason of death <sup>d</sup> ; duration (in days/months) after tuberculous peritonitis was diagnosed |
|-------------|--------------------------------------------------|------------------------|------------|----------------------------------------|---------------------------------------------------------------------------|------------------------------------------------------------------------------------------|--------------------------------------------------------------------------------------------|-----------------------------|------------------------------------------------------------------------------------------------------|
| 15          | Vathsala <i>et al.</i> <sup>(S9)</sup> /1987     | Singapore              | 54/F       | No                                     | -                                                                         | Not reported                                                                             | No                                                                                         | No                          | -                                                                                                    |
| 16          | Yorioka <i>et al.</i> <sup>(S10)</sup> /1988     | Japan                  | 61/F       | Yes                                    | 8                                                                         | 6.3                                                                                      | No                                                                                         | No                          | -                                                                                                    |
| 17          | Cheng <i>et al.</i> <sup>(S11)</sup> /1989       | Hong Kong              | 47/F       | Yes                                    | 10                                                                        | 6.4                                                                                      | No                                                                                         | Yes                         | Cardiac arrest; 2 months                                                                             |
| 18          | Cheng <i>et al.</i> <sup>(S11)</sup> /1989       | Hong Kong              | 33/M       | Yes                                    | 288                                                                       | 27                                                                                       | No                                                                                         | No                          |                                                                                                      |
| 19          | Cheng <i>et al.</i> <sup>(S11)</sup> /1989       | Hong Kong              | 24/M       | Yes                                    | 30                                                                        | 4.3                                                                                      | Yes, <i>coagulase-negative staphylococcus</i>                                              | No                          |                                                                                                      |
| 20          | Cheng <i>et al.</i> <sup>(S11)</sup> /1989       | Hong Kong              | 61/F       | No                                     | -                                                                         | 1.9                                                                                      | No                                                                                         | No                          |                                                                                                      |
| 21          | Cheng <i>et al.</i> <sup>(S11)</sup> /1989       | Hong Kong              | 42/F       | No                                     | -                                                                         | 5.6                                                                                      | No                                                                                         | No                          |                                                                                                      |
| 22          | Baumgartner <i>et al.</i> <sup>(S12)</sup> /1989 | USA                    | 47/M       | No                                     | -                                                                         | 3                                                                                        | No                                                                                         | Yes                         | AIDS-related cachexia; 1 year                                                                        |
| 23          | Mallat and Brensilver <sup>(S13)</sup> /1989     | USA                    | 54/M       | No                                     | -                                                                         | 3                                                                                        | No                                                                                         | No                          |                                                                                                      |
| 24          | Lye <i>et al.</i> <sup>(S14)</sup> /1990         | Singapore              | 57/F       | Yes                                    | Not reported                                                              | Not reported                                                                             | No                                                                                         | Not reported                |                                                                                                      |
| 25          | Ahijado <i>et al.</i> <sup>(S15)</sup> /1991     | Spain                  | 34/M       | Yes                                    | Not reported                                                              | Not reported                                                                             | Yes, <i>Pseudomonas spp.</i>                                                               | No                          |                                                                                                      |
| 26          | Ahijado <i>et al.</i> <sup>(S15)</sup> /1991     | Spain                  | 52/M       | Yes                                    | Not reported                                                              | Not reported                                                                             | Yes, <i>Staphylococcus aureus</i> & <i>Candida spp.</i>                                    | Yes                         | Committed suicide; died before tuberculous peritonitis was diagnosed                                 |
| 27          | Ahijado <i>et al.</i> <sup>(S15)</sup> /1991     | Spain                  | 55/M       | Yes                                    | Not reported                                                              | Not reported                                                                             | Yes, <i>Staphylococcus aureus</i>                                                          | No                          |                                                                                                      |
| 28          | Ahijado <i>et al.</i> <sup>(S15)</sup> /1991     | Spain                  | 63/F       | Yes                                    | Not reported                                                              | Not reported                                                                             | Yes, <i>Staphylococcus epidermidis</i> & <i>Corynebacterium spp.</i>                       | No                          |                                                                                                      |
| 29          | Tan <i>et al.</i> <sup>(S16)</sup> /1991         | USA                    | 37/M       | No                                     | -                                                                         | Not reported                                                                             | No                                                                                         | No                          |                                                                                                      |
| 30          | Tan <i>et al.</i> <sup>(S16)</sup> /1991         | USA                    | 58/F       | No                                     | -                                                                         | Not reported                                                                             | Catheter exit-site treated with vancomycin & gentamicin                                    | Yes                         | Leg gangrene; exact duration not specified (few weeks later)                                         |
| 31          | Tan <i>et al.</i> <sup>(S16)</sup> /1991         | USA                    | 77/M       | No                                     | -                                                                         | 3.5                                                                                      | No                                                                                         | No                          |                                                                                                      |
| 32          | Kwan <i>et al.</i> <sup>(S17)</sup> /1991        | UK                     | M          | Yes                                    | Not reported                                                              | Not reported                                                                             | No                                                                                         | No                          |                                                                                                      |
| 33          | Kwan <i>et al.</i> <sup>(S17)</sup> /1991        | UK                     | F          | Yes                                    | Not reported                                                              | Not reported                                                                             | No                                                                                         | No                          |                                                                                                      |
| 34          | Kwan <i>et al.</i> <sup>(S17)</sup> /1991        | UK                     | F          | N/A                                    | Not reported                                                              | Not reported                                                                             | No                                                                                         | Yes                         | Cardiac-related death; not reported                                                                  |

| Patient No. | Author/year of publication                        | Country of publication | Age/Gender | Was PD catheter removed <sup>a</sup> ? | Time (in days) of PD catheter removal from onset of symptoms <sup>b</sup> | Time (in weeks) antituberculosis therapy was started from onset of symptoms <sup>b</sup> | Concomitant <sup>c</sup> or within 4 weeks of another bacterial PD-associated peritonitis? | Death <sup>d</sup> (Yes/No) | Reason of death <sup>d</sup> ; duration (in days/months) after tuberculous peritonitis was diagnosed |
|-------------|---------------------------------------------------|------------------------|------------|----------------------------------------|---------------------------------------------------------------------------|------------------------------------------------------------------------------------------|--------------------------------------------------------------------------------------------|-----------------------------|------------------------------------------------------------------------------------------------------|
| 35          | Kwan <i>et al.</i> <sup>(S17)</sup> /1991         | UK                     | F          | N/A                                    | Not reported                                                              | Not reported                                                                             | No                                                                                         | Yes                         | Cardiac-related death; not reported                                                                  |
| 36          | Ong <i>et al.</i> <sup>(S18)</sup> /1992          | UK                     | 63/M       | Yes                                    | 28                                                                        | Not reported                                                                             | No                                                                                         | No                          |                                                                                                      |
| 37          | Ong <i>et al.</i> <sup>(S18)</sup> /1992          | UK                     | 57/F       | Yes                                    | 11                                                                        | 5                                                                                        | No                                                                                         | No                          |                                                                                                      |
| 38          | Ong <i>et al.</i> <sup>(S18)</sup> /1992          | UK                     | 70/M       | Yes                                    | 12                                                                        | 6                                                                                        | No                                                                                         | Yes                         | Unrelated illness; 6 months                                                                          |
| 39          | Perez Fontan <i>et al.</i> <sup>(S19)</sup> /1992 | Spain                  | 60/M       | No                                     | -                                                                         | Died                                                                                     | No                                                                                         | Yes                         | Cardiac-related; 15 days                                                                             |
| 40          | Perez Fontan <i>et al.</i> <sup>(S19)</sup> /1992 | Spain                  | 66/M       | No                                     | -                                                                         | Died                                                                                     | No                                                                                         | Yes                         | Tuberculous peritonitis; 14 days                                                                     |
| 41          | Cebrian <i>et al.</i> <sup>(S20)</sup> /1992      | Spain                  | 50/M       | Yes                                    | 14                                                                        | 6.4                                                                                      | No                                                                                         | Yes                         | Myocardial infarction; 20 days                                                                       |
| 42          | Mousson <i>et al.</i> <sup>(S21)</sup> /1993      | France                 | 69/F       | No                                     | -                                                                         | 7                                                                                        | No                                                                                         | No                          |                                                                                                      |
| 43          | Tsai <i>et al.</i> <sup>(S22)</sup> /1994         | Taiwan                 | 13/F       | No                                     | -                                                                         | 0.6                                                                                      | No                                                                                         | No                          |                                                                                                      |
| 44          | Aguirre <i>et al.</i> <sup>(S23)</sup> /1994      | Spain                  | 71/M       | No                                     | -                                                                         | 4                                                                                        | No                                                                                         | No                          |                                                                                                      |
| 45          | Ha <i>et al.</i> <sup>(S24)</sup> /1995           | Korea                  | 60/F       | Yes                                    | 15                                                                        | Not reported                                                                             | No                                                                                         | No                          |                                                                                                      |
| 46          | Herrera <i>et al.</i> <sup>(S25)</sup> /1996      | Spain                  | 75/F       | Yes                                    | 5                                                                         | Not reported                                                                             | Not reported                                                                               | No                          |                                                                                                      |
| 47          | Huang <i>et al.</i> <sup>(S26)</sup> /1996        | Taiwan                 | 62/F       | Yes                                    | 13                                                                        | 50                                                                                       | No                                                                                         | Yes                         | Cardiopulmonary failure; 3 months                                                                    |
| 48          | Lui <i>et al.</i> <sup>(S27)</sup> /1996          | Hong Kong              | 60/F       | No                                     | -                                                                         | 4                                                                                        | Yes, organism not specified                                                                | No                          |                                                                                                      |
| 49          | Lui <i>et al.</i> <sup>(S27)</sup> /1996          | Hong Kong              | 24/F       | No                                     | -                                                                         | 8                                                                                        | No                                                                                         | No                          |                                                                                                      |
| 50          | Lui <i>et al.</i> <sup>(S27)</sup> /1996          | Hong Kong              | 61/M       | N/A; died                              | Not reported                                                              | 8                                                                                        | No                                                                                         | Yes                         | Sudden cardiac death; not reported                                                                   |
| 51          | Lui <i>et al.</i> <sup>(S27)</sup> /1996          | Hong Kong              | 60/F       | N/A; died                              | Not reported                                                              | 2                                                                                        | No                                                                                         | Yes                         | Sudden cardiac death; 9 months                                                                       |
| 52          | Lui <i>et al.</i> <sup>(S27)</sup> /1996          | Hong Kong              | 35/F       | No                                     | -                                                                         | 12                                                                                       | Yes, organism not specified                                                                | No                          |                                                                                                      |
| 53          | Lui <i>et al.</i> <sup>(S27)</sup> /1996          | Hong Kong              | 58/F       | Yes                                    | Not reported                                                              | 20                                                                                       | No                                                                                         | No                          |                                                                                                      |

| Patient No. | Author/year of publication                     | Country of publication | Age/Gender | Was PD catheter removed <sup>a</sup> ? | Time (in days) of PD catheter removal from onset of symptoms <sup>b</sup> | Time (in weeks) antituberculosis therapy was started from onset of symptoms <sup>b</sup> | Concomitant <sup>c</sup> or within 4 weeks of another bacterial PD-associated peritonitis? | Death <sup>d</sup> (Yes/No) | Reason of death <sup>d</sup> ; duration (in days/months) after tuberculous peritonitis was diagnosed |
|-------------|------------------------------------------------|------------------------|------------|----------------------------------------|---------------------------------------------------------------------------|------------------------------------------------------------------------------------------|--------------------------------------------------------------------------------------------|-----------------------------|------------------------------------------------------------------------------------------------------|
| 54          | Lui <i>et al.</i> <sup>(S27)</sup> /1996       | Hong Kong              | 35/F       | No                                     | -                                                                         | 12                                                                                       | No                                                                                         | No                          |                                                                                                      |
| 55          | Lui <i>et al.</i> <sup>(S27)</sup> /1996       | Hong Kong              | 47/M       | No                                     | -                                                                         | 16                                                                                       | No                                                                                         | No                          |                                                                                                      |
| 56          | Lui <i>et al.</i> <sup>(S27)</sup> /1996       | Hong Kong              | 40/M       | No                                     | Not reported                                                              | 4                                                                                        | No                                                                                         | No                          |                                                                                                      |
| 57          | Lui <i>et al.</i> <sup>(S27)</sup> /1996       | Hong Kong              | 33/M       | Yes                                    | Not reported                                                              | 24                                                                                       | No                                                                                         | No                          |                                                                                                      |
| 58          | Yoshitake <i>et al.</i> <sup>(S28)</sup> /1998 | Japan                  | 73/M       | Yes                                    | 19                                                                        | 14                                                                                       | No                                                                                         | Yes                         | Multiorgan failure from pneumonia; 6 months                                                          |
| 59          | Dogukan <i>et al.</i> <sup>(S29)</sup> /1998   | Turkey                 | 45/F       | No                                     | -                                                                         | 3                                                                                        | No                                                                                         | No                          |                                                                                                      |
| 60          | Prakash <sup>(S30)</sup> /1999                 | India                  | 24/M       | Yes                                    | 7                                                                         | Taking antituberculosis therapy for pulmonary TB                                         | No                                                                                         | No                          |                                                                                                      |
| 61          | Prakash <sup>(S30)</sup> /1999                 | India                  | 62/M       | Yes                                    | 7                                                                         | 7                                                                                        | No                                                                                         | Yes                         | Tuberculous peritonitis; 12 days                                                                     |
| 62          | Talwani <i>et al.</i> <sup>(S31)</sup> /2000   | USA                    | 37/M       | Yes                                    | 35                                                                        | 37                                                                                       | Yes, <i>Candida tropicalis</i>                                                             | No                          |                                                                                                      |
| 63          | Quantrill <i>et al.</i> <sup>(S32)</sup> /2001 | UK                     | 59/F       | No                                     | -                                                                         | Not reported                                                                             | No                                                                                         | No                          |                                                                                                      |
| 64          | Quantrill <i>et al.</i> <sup>(S32)</sup> /2001 | UK                     | 58/M       | Yes                                    | Not reported                                                              | Not reported                                                                             | No                                                                                         | Yes                         | Unrelated to tuberculous peritonitis; not reported                                                   |
| 65          | Quantrill <i>et al.</i> <sup>(S32)</sup> /2001 | UK                     | 58/F       | Yes                                    | Not reported                                                              | Not reported                                                                             | No                                                                                         | No                          |                                                                                                      |
| 66          | Quantrill <i>et al.</i> <sup>(S32)</sup> /2001 | UK                     | 63/F       | No                                     | -                                                                         | Not reported                                                                             | No                                                                                         | Yes                         | Unrelated to tuberculous peritonitis; not reported                                                   |
| 67          | Quantrill <i>et al.</i> <sup>(S32)</sup> /2001 | UK                     | 34/F       | No                                     | -                                                                         | Not reported                                                                             | No                                                                                         | No                          |                                                                                                      |
| 68          | Quantrill <i>et al.</i> <sup>(S32)</sup> /2001 | UK                     | 36/M       | No                                     | -                                                                         | Not reported                                                                             | No                                                                                         | No                          |                                                                                                      |
| 69          | Quantrill <i>et al.</i> <sup>(S32)</sup> /2001 | UK                     | 57/M       | No                                     | -                                                                         | Not reported                                                                             | No                                                                                         | Yes                         | Acute small bowel obstruction secondary to adhesions; not reported                                   |
| 70          | Quantrill <i>et al.</i> <sup>(S32)</sup> /2001 | UK                     | 73/M       | Yes                                    | Not reported                                                              | Not reported                                                                             | No                                                                                         | No                          |                                                                                                      |
| 71          | Gupta and Prakash <sup>(S33)</sup> /2001       | India                  | 65/M       | No                                     | -                                                                         | 4                                                                                        | No                                                                                         | Yes                         | Tuberculous peritonitis; not reported                                                                |
| 72          | Abraham <i>et al.</i> <sup>(S34)</sup> /2001   | India                  | 18/M       | Yes                                    | Not reported                                                              | Not reported                                                                             | Yes, <i>Candida spp.</i>                                                                   | No                          |                                                                                                      |
| 73          | Abraham <i>et al.</i> <sup>(S34)</sup> /2001   | India                  | 55/M       | Yes                                    | Not reported                                                              | Not reported                                                                             | Yes, organism not specified                                                                | Yes                         | Not reported; duration unknown                                                                       |
| 74          | Abraham <i>et al.</i> <sup>(S34)</sup> /2001   | India                  | 67/F       | Yes                                    | Not reported                                                              | Not reported                                                                             | Yes, organism not specified                                                                | Yes                         | Not reported; duration unknown                                                                       |
| 75          | Abraham <i>et al.</i> <sup>(S34)</sup> /2001   | India                  | 69/F       | Yes                                    | Not reported; PD catheter removed and reinserted                          | Not reported                                                                             | Yes, organism not specified                                                                | No                          |                                                                                                      |

| Patient No. | Author/year of publication                       | Country of publication | Age/Gender | Was PD catheter removed <sup>a</sup> ? | Time (in days) of PD catheter removal from onset of symptoms <sup>b</sup> | Time (in weeks) antituberculosis therapy was started from onset of symptoms <sup>b</sup> | Concomitant <sup>c</sup> or within 4 weeks of another bacterial PD-associated peritonitis? | Death <sup>d</sup> (Yes/No) | Reason of death <sup>d</sup> ; duration (in days/months) after tuberculous peritonitis was diagnosed                    |
|-------------|--------------------------------------------------|------------------------|------------|----------------------------------------|---------------------------------------------------------------------------|------------------------------------------------------------------------------------------|--------------------------------------------------------------------------------------------|-----------------------------|-------------------------------------------------------------------------------------------------------------------------|
| 76          | Lui <i>et al.</i> <sup>(S35)</sup> /2002         | Hong Kong              | 43/F       | Not reported                           | Not reported                                                              | 0.4                                                                                      | No                                                                                         | No                          |                                                                                                                         |
| 77          | Bouraoui <i>et al.</i> <sup>(S37)</sup> /2002    | Tunisia                | 38/F       | No                                     | -                                                                         | 9.7                                                                                      | No                                                                                         | No                          |                                                                                                                         |
| 78          | Lye <i>et al.</i> <sup>(S36)</sup> /2002         | Singapore              | 18/M       | Yes                                    | 10                                                                        | 6                                                                                        | No                                                                                         | Not reported                |                                                                                                                         |
| 79          | Lye <i>et al.</i> <sup>(S36)</sup> /2002         | Singapore              | 50/M       | Yes                                    | 14                                                                        | 6                                                                                        | No                                                                                         | Not reported                |                                                                                                                         |
| 80          | Hung <i>et al.</i> <sup>(S38)</sup> /2003        | Taiwan                 | 42/F       | Yes                                    | Not reported                                                              | 6                                                                                        | No                                                                                         | No                          |                                                                                                                         |
| 81          | Karayaylali <i>et al.</i> <sup>(S39)</sup> /2003 | Turkey                 | 42/F       | Yes                                    | Not reported                                                              | 1                                                                                        | No                                                                                         | No                          |                                                                                                                         |
| 82          | Karayaylali <i>et al.</i> <sup>(S39)</sup> /2003 | Turkey                 | 20/M       | Yes                                    | Not reported                                                              | 4                                                                                        | No                                                                                         | Yes                         | Tuberculous peritonitis; duration not reported                                                                          |
| 83          | Karayaylali <i>et al.</i> <sup>(S39)</sup> /2003 | Turkey                 | 31/M       | Yes                                    | Not reported                                                              | 8                                                                                        | No                                                                                         | No                          |                                                                                                                         |
| 84          | Karayaylali <i>et al.</i> <sup>(S39)</sup> /2003 | Turkey                 | 49/M       | No                                     | -                                                                         | 1.5                                                                                      | No                                                                                         | Yes                         | Pulmonary embolism; duration not reported                                                                               |
| 85          | Karayaylali <i>et al.</i> <sup>(S39)</sup> /2003 | Turkey                 | 45/F       | No                                     | -                                                                         | 1.5                                                                                      | No                                                                                         | No                          |                                                                                                                         |
| 86          | Karayaylali <i>et al.</i> <sup>(S39)</sup> /2003 | Turkey                 | 49/M       | Yes                                    | Not reported                                                              | 1.5                                                                                      | No                                                                                         | Yes                         | Tuberculous peritonitis; duration not reported                                                                          |
| 87          | Karayaylali <i>et al.</i> <sup>(S39)</sup> /2003 | Turkey                 | 36/F       | No                                     | -                                                                         | -                                                                                        | No                                                                                         | No                          |                                                                                                                         |
| 88          | Karayaylali <i>et al.</i> <sup>(S39)</sup> /2003 | Turkey                 | 25/F       | Yes                                    | Not reported                                                              | 2                                                                                        | No                                                                                         | Yes                         | Tuberculous peritonitis; duration not reported                                                                          |
| 89          | Karayaylali <i>et al.</i> <sup>(S39)</sup> /2003 | Turkey                 | 45/M       | Yes                                    | Not reported                                                              | 5                                                                                        | No                                                                                         | No                          |                                                                                                                         |
| 90          | Karayaylali <i>et al.</i> <sup>(S39)</sup> /2003 | Turkey                 | 30/F       | Yes                                    | Not reported                                                              | -                                                                                        | No                                                                                         | No                          |                                                                                                                         |
| 91          | Johnson <i>et al.</i> <sup>(S40)</sup> /2003     | Australia              | 57/F       | Not reported                           | Not reported                                                              | 3                                                                                        | Yes, culture-negative but improved with vancomycin                                         | Yes                         | Bowel perforation; 1 day                                                                                                |
| 92          | Malik <i>et al.</i> <sup>(S41)</sup> /2003       | Saudi Arabia           | 57/M       | Yes                                    | Not reported                                                              | Not reported                                                                             | No                                                                                         | No                          |                                                                                                                         |
| 93          | Malik <i>et al.</i> <sup>(S41)</sup> /2003       | Saudi Arabia           | 71/M       | No                                     | -                                                                         | Not reported                                                                             | Yes, <i>Klebsiella pneumoniae</i>                                                          | No                          |                                                                                                                         |
| 94          | Ogutmen <i>et al.</i> <sup>(S42)</sup> /2003     | Turkey                 | 32/M       | No                                     | -                                                                         | Not reported                                                                             | No                                                                                         | No                          |                                                                                                                         |
| 95          | Sahin <i>et al.</i> <sup>(S43)</sup> /2004       | Turkey                 | 36/M       | No                                     | -                                                                         | Not reported                                                                             | No                                                                                         | No                          |                                                                                                                         |
| 96          | Vadivel <i>et al.</i> <sup>(S44)</sup> /2006     | USA                    | 62/F       | Yes                                    | Not reported                                                              | Not reported                                                                             | No                                                                                         | Yes                         | Likely related to tuberculous peritonitis (acute hypoxamic respiratory failure of unknown etiology and sepsis); 1 month |
| 97          | Canbakan <i>et al.</i> <sup>(S45)</sup> /2006    | Turkey                 | 39/M       | No                                     | -                                                                         | 1.2                                                                                      | No                                                                                         | No                          |                                                                                                                         |
| 98          | Dervisoglu <i>et al.</i> <sup>(S46)</sup> /2006  | Turkey                 | Turkey     | Yes                                    | 22                                                                        | 5.5                                                                                      | No                                                                                         | No                          |                                                                                                                         |

| Patient No. | Author/year of publication                        | Country of publication | Age/Gender        | Was PD catheter removed <sup>a</sup> ? | Time (in days) of PD catheter removal from onset of symptoms <sup>b</sup> | Time (in weeks) antituberculosis therapy was started from onset of symptoms <sup>b</sup> | Concomitant <sup>c</sup> or within 4 weeks of another bacterial PD-associated peritonitis? | Death <sup>d</sup> (Yes/No) | Reason of death <sup>d</sup> ; duration (in days/months) after tuberculous peritonitis was diagnosed |
|-------------|---------------------------------------------------|------------------------|-------------------|----------------------------------------|---------------------------------------------------------------------------|------------------------------------------------------------------------------------------|--------------------------------------------------------------------------------------------|-----------------------------|------------------------------------------------------------------------------------------------------|
| 99          | Borrajó Prol <i>et al.</i> <sup>(S47)</sup> /2009 | Spain                  | 50/F              | Not reported                           | Not reported                                                              | Not reported                                                                             | No                                                                                         | No                          |                                                                                                      |
| 100         | Chiu <i>et al.</i> <sup>(S48)</sup> /2011         | Taiwan                 | 71/F              | Yes                                    | Not reported                                                              | Not reported                                                                             | Yes, organism not specified                                                                | No                          |                                                                                                      |
| 101         | Chiu <i>et al.</i> <sup>(S48)</sup> /2011         | Taiwan                 | 62/F              | Yes                                    | Not reported                                                              | Not reported                                                                             | No                                                                                         | No                          |                                                                                                      |
| 102         | Chiu <i>et al.</i> <sup>(S48)</sup> /2011         | Taiwan                 | 71/M              | Yes                                    | Not reported                                                              | Not reported                                                                             | No                                                                                         | Yes                         | Septic shock from pneumonia; 21 days                                                                 |
| 103         | Chiu <i>et al.</i> <sup>(S48)</sup> /2011         | Taiwan                 | 52/M              | Yes                                    | Not reported                                                              | Not reported                                                                             | No                                                                                         | No                          |                                                                                                      |
| 104         | Chiu <i>et al.</i> <sup>(S48)</sup> /2011         | Taiwan                 | 66/F              | No                                     | -                                                                         | Not reported                                                                             | No                                                                                         | No                          |                                                                                                      |
| 105         | Chiu <i>et al.</i> <sup>(S48)</sup> /2011         | Taiwan                 | 55/F              | No                                     | -                                                                         | Not reported                                                                             | No                                                                                         | No                          |                                                                                                      |
| 106         | Chiu <i>et al.</i> <sup>(S48)</sup> /2011         | Taiwan                 | 61/F              | No                                     | -                                                                         | Not reported                                                                             | No                                                                                         | No                          |                                                                                                      |
| 107         | Wang <i>et al.</i> <sup>(S49)</sup> /2011         | Taiwan                 | 24/M              | Yes                                    | Not reported                                                              | 2                                                                                        | No                                                                                         | No                          |                                                                                                      |
| 108         | Gursu <i>et al.</i> <sup>(S50)</sup> /2011        | Turkey                 | 22/M              | Yes                                    | Not reported                                                              | Not reported                                                                             | No                                                                                         | No                          |                                                                                                      |
| 109         | Tseng <i>et al.</i> <sup>(S51)</sup> /2012        | Taiwan                 | 76/M              | Yes                                    | 20                                                                        | 5                                                                                        | No                                                                                         | Yes                         | Intracranial haemorrhage; 2 months                                                                   |
| 110         | Waness and Shohaib <sup>(S52)</sup> /2012         | Saudi Arabia           | 54/M              | Yes                                    | Not reported                                                              | Not reported                                                                             | No                                                                                         | No                          |                                                                                                      |
| 111         | Waness and Shohaib <sup>(S52)</sup> /2012         | Saudi Arabia           | 57/F              | Yes                                    | Not reported                                                              | Not reported                                                                             | No                                                                                         | No                          |                                                                                                      |
| 112         | Waness and Shohaib <sup>(S52)</sup> /2012         | Saudi Arabia           | 48/M              | Yes                                    | Not reported                                                              | Not reported                                                                             | No                                                                                         | No                          |                                                                                                      |
| 113         | Waness and Shohaib <sup>(S52)</sup> /2012         | Saudi Arabia           | 52/M              | Yes                                    | Not reported                                                              | Not reported                                                                             | No                                                                                         | No                          |                                                                                                      |
| 114         | Lin <i>et al.</i> <sup>(S53)</sup> /2014          | Taiwan                 | 44/M              | Yes                                    | Not reported                                                              | Not reported                                                                             | No                                                                                         | No                          |                                                                                                      |
| 115         | Lin <i>et al.</i> <sup>(S53)</sup> /2014          | Taiwan                 | 49/F <sup>c</sup> | No                                     | -                                                                         | Not reported                                                                             | No                                                                                         | No                          |                                                                                                      |
| 116         | Lin <i>et al.</i> <sup>(S53)</sup> /2014          | Taiwan                 | 50/F              | No                                     | -                                                                         | Not reported                                                                             | No                                                                                         | No                          |                                                                                                      |
| 117         | Lin <i>et al.</i> <sup>(S53)</sup> /2014          | Taiwan                 | 71/F              | Died                                   | Not reported                                                              | Not reported                                                                             | Yes, <i>Serratia marcescens</i>                                                            | Yes                         | PD peritonitis related death; septic shock and multiple organ failure; duration not reported         |

| Patient No. | Author/year of publication                       | Country of publication | Age/Gender | Was PD catheter removed <sup>a</sup> ? | Time (in days) of PD catheter removal from onset of symptoms <sup>b</sup>              | Time (in weeks) antituberculosis therapy was started from onset of symptoms <sup>b</sup> | Concomitant <sup>c</sup> or within 4 weeks of another bacterial PD-associated peritonitis?               | Death <sup>d</sup> (Yes/No) | Reason of death <sup>d</sup> ; duration (in days/months) after tuberculous peritonitis was diagnosed |
|-------------|--------------------------------------------------|------------------------|------------|----------------------------------------|----------------------------------------------------------------------------------------|------------------------------------------------------------------------------------------|----------------------------------------------------------------------------------------------------------|-----------------------------|------------------------------------------------------------------------------------------------------|
| 118         | Iqbal <i>et al.</i> <sup>(S54)</sup> /2015       | United Kingdom         | 86/M       | Yes                                    | Not reported                                                                           | Not reported                                                                             | Had two episodes of culture-negative peritonitis each within 1 month of antibiotic therapy with recovery | Yes                         | Withdrawal from HD; 4.5 months                                                                       |
| 119         | Rahal <i>et al.</i> <sup>(S55)</sup> /2015       | USA                    | 60/F       | Yes                                    | 56 (multiple admissions over 2 months for peritonitis without microbiologic diagnosis) | 4                                                                                        | No                                                                                                       | No                          | -                                                                                                    |
| 120         | Rahman <i>et al.</i> <sup>(S56)</sup> /2015      | Saudi Arabia           | 75/F       | No                                     | Not reported                                                                           | Not reported                                                                             | Yes, <i>Aspergillus Fumigatus</i>                                                                        | Yes                         | Related to tuberculous peritonitis; 4 weeks                                                          |
| 121         | Rohit <i>et al.</i> <sup>(S57)</sup> /2016       | India                  | 68/M       | Yes                                    | 9                                                                                      | Died before antituberculosis treatment was started                                       | No                                                                                                       | Yes                         | Cardiac arrest; 12 weeks                                                                             |
| 122         | Rohit <i>et al.</i> <sup>(S57)</sup> /2016       | India                  | 60/M       | Yes                                    | Not reported                                                                           | Not reported                                                                             | Yes, <i>Coagulase negative staphylococcus spp.</i>                                                       | Yes                         | Presumed PD-associated peritonitis; duration unknown                                                 |
| 123         | Rohit <i>et al.</i> <sup>(S57)</sup> /2016       | India                  | 28/F       | No                                     | -                                                                                      | Not reported                                                                             | Yes, 1 episode of bacterial peritonitis of unknown organism                                              | No                          |                                                                                                      |
| 124         | Rohit <i>et al.</i> <sup>(S57)</sup> /2016       | India                  | 57/M       | No                                     | -                                                                                      | Not reported                                                                             | TB PCR of dialysate positive in several episodes over 4 years                                            | Yes                         | Died on the third episode of tuberculous peritonitis; 5 months                                       |
| 125         | Edwards <i>et al.</i> <sup>(S58)</sup> /2016     | UK                     | 59/F       | No                                     |                                                                                        | 2.3                                                                                      | No                                                                                                       | No                          |                                                                                                      |
| 126         | Edwards <i>et al.</i> <sup>(S58)</sup> /2016     | UK                     | 50/F       | No                                     |                                                                                        | 2                                                                                        | No                                                                                                       | No                          |                                                                                                      |
| 127         | Tamayo-Isla <i>et al.</i> <sup>(S59)</sup> /2016 | South Africa           | 45/F       | Yes                                    | 24                                                                                     |                                                                                          | No                                                                                                       | No                          |                                                                                                      |
| 128         | Tamayo-Isla <i>et al.</i> <sup>(S59)</sup> /2016 | South Africa           | 30/M       | Yes                                    | 14                                                                                     | 5.86                                                                                     | No                                                                                                       | No                          |                                                                                                      |
| 129         | Tamayo-Isla <i>et al.</i> <sup>(S59)</sup> /2016 | South Africa           | 29/M       | Yes                                    | 21                                                                                     | 3.86                                                                                     | No                                                                                                       | Yes                         | Related to tuberculous peritonitis; duration not reported                                            |
| 130         | Tamayo-Isla <i>et al.</i> <sup>(S59)</sup> /2016 | South Africa           | 51/M       | Yes                                    | 1                                                                                      | 0.42                                                                                     | Yes; <i>Staphylococcus cohnii</i>                                                                        | No                          |                                                                                                      |
| 131         | Tamayo-Isla <i>et al.</i> <sup>(S59)</sup> /2016 | South Africa           | 50/F       | Yes                                    | 15                                                                                     | 2.14                                                                                     | No                                                                                                       | Yes                         | Related to tuberculous peritonitis; duration not reported                                            |
| 132         | Tamayo-Isla <i>et al.</i> <sup>(S59)</sup> /2016 | South Africa           | 34/M       | Yes                                    | 8                                                                                      | 6.71                                                                                     | No                                                                                                       | Yes                         | Related to tuberculous peritonitis; duration not reported                                            |
| 133         | Tamayo-Isla <i>et al.</i> <sup>(S59)</sup> /2016 | South Africa           | 28/F       | No                                     |                                                                                        | 8.71                                                                                     | No                                                                                                       | Yes                         | Related to tuberculous peritonitis; duration not reported                                            |
| 134         | Tamayo-Isla <i>et al.</i> <sup>(S59)</sup> /2016 | South Africa           | 37/F       | Yes                                    | 61                                                                                     | 9.85                                                                                     | No                                                                                                       | Yes                         | Related to tuberculous peritonitis; duration not reported                                            |
| 135         | Tamayo-Isla <i>et al.</i> <sup>(S59)</sup> /2016 | South Africa           | 17/F       | Yes                                    | 7                                                                                      | 1.0                                                                                      | No                                                                                                       | No                          |                                                                                                      |

| Patient No. | Author/year of publication                        | Country of publication | Age/Gender | Was PD catheter removed <sup>a</sup> ? | Time (in days) of PD catheter removal from onset of symptoms <sup>b</sup> | Time (in weeks) antituberculosis therapy was started from onset of symptoms <sup>b</sup>    | Concomitant <sup>c</sup> or within 4 weeks of another bacterial PD-associated peritonitis? | Death <sup>d</sup> (Yes/No) | Reason of death <sup>d</sup> ; duration (in days/months) after tuberculous peritonitis was diagnosed                         |
|-------------|---------------------------------------------------|------------------------|------------|----------------------------------------|---------------------------------------------------------------------------|---------------------------------------------------------------------------------------------|--------------------------------------------------------------------------------------------|-----------------------------|------------------------------------------------------------------------------------------------------------------------------|
| 136         | Tamayo-Isla <i>et al.</i> <sup>(S59)</sup> /2016  | South Africa           | 39/M       | Yes                                    | 38                                                                        | 5.14                                                                                        | No                                                                                         | No                          |                                                                                                                              |
| 137         | Tamayo-Isla <i>et al.</i> <sup>(S59)</sup> /2016  | South Africa           | 41/F       | Yes                                    | 10                                                                        | 0.86                                                                                        | No                                                                                         | Yes                         | Related to tuberculous peritonitis; duration not reported                                                                    |
| 138         | Tamayo-Isla <i>et al.</i> <sup>(S59)</sup> /2016  | South Africa           | 24/M       | Yes                                    | 7                                                                         | 1.29                                                                                        | No                                                                                         | No                          |                                                                                                                              |
| 139         | Ada <i>et al.</i> <sup>(S60)</sup> /2017          | Turkey                 | 60/M       | No                                     | -                                                                         | Not reported                                                                                | No                                                                                         | No                          |                                                                                                                              |
| 140         | Mogili <i>et al.</i> <sup>(S61)</sup> /2017       | India                  | 35/M       | No                                     | -                                                                         | 1                                                                                           | No                                                                                         | No                          |                                                                                                                              |
| 141         | De la Cruz-Temores <i>et al.</i> <sup>(S62)</sup> | Mexico                 | 54/M       | Yes                                    | 7                                                                         | Not reported                                                                                | No                                                                                         | No                          |                                                                                                                              |
| 142         | Patcha <i>et al.</i> <sup>(S63)</sup> /2018       | Philippines            | 42/M       | Yes                                    | 7                                                                         | Not reported                                                                                | No                                                                                         | No                          |                                                                                                                              |
| 143         | Haikal <i>et al.</i> <sup>(S64)</sup> /2019       | Malaysia               | 40/F       | Yes                                    | 14                                                                        | Not reported                                                                                | No                                                                                         | Yes                         | Catheter-related bloodstream infection with <i>Methicillin Resistant Staphylococcus aureus</i> (MRSA); duration not reported |
| 144         | Adriwesh <i>et al.</i> <sup>(S65)</sup> /2021     | Saudi Arabia           | 10/F       | Yes                                    | 7                                                                         | 26                                                                                          | No                                                                                         | No                          |                                                                                                                              |
| 145         | Kurniaatmaja <i>et al.</i> <sup>(S66)</sup> /2021 | Indonesia              | 37/M       | Yes                                    | Not reported                                                              | Not reported                                                                                | No                                                                                         | No                          |                                                                                                                              |
| 146         | Relvas <i>et al.</i> <sup>(S67)</sup> /2021       | Portugal               | 46/M       | No                                     | -                                                                         | 1.3                                                                                         | No                                                                                         | No                          |                                                                                                                              |
| 147         | Dassi <i>et al.</i> <sup>(S69)</sup> /2021        | India                  | 49/M       | Yes                                    | Not reported                                                              | Not reported                                                                                | No                                                                                         | No                          |                                                                                                                              |
| 148         | Sfae <i>et al.</i> <sup>(S68)</sup> /2022         | Morocco                | 50/F       | No                                     | -                                                                         | Not reported                                                                                | No                                                                                         | No                          |                                                                                                                              |
| 149         | Sfae <i>et al.</i> <sup>(S68)</sup> /2022         | Morocco                | 45/M       | Yes                                    | 10                                                                        | 2.7                                                                                         | No                                                                                         | No                          |                                                                                                                              |
| 150         | Sfae <i>et al.</i> <sup>(S68)</sup> /2022         | Morocco                | 64/M       | No                                     | -                                                                         | Not reported; but started antituberculosis regimen for the treatment of active pulmonary TB | No                                                                                         | No                          |                                                                                                                              |
| 151         | Yuananda <i>et al.</i> <sup>(S70)</sup> /2022     | Indonesia              | 28/F       | Yes                                    | Not reported                                                              | Not reported                                                                                | Yes, gram-positive coccus                                                                  | No                          |                                                                                                                              |



AIDS=acquired immunodeficiency syndrome; F=female; HD=haemodialysis; IM=intramuscular; M=male; N/A=not applicable; PCR=polymerase chain reaction; PD=peritoneal dialysis; *M. tuberculosis*=*Mycobacterium tuberculosis*; TB=tuberculosis

<sup>a</sup> PD catheter removal associated with tuberculous peritonitis

<sup>b</sup> Symptoms of tuberculous PD-associated peritonitis

<sup>c</sup> Organism identified on the same day when *M. tuberculosis* was identified or while receiving antituberculosis therapy for tuberculous peritonitis

<sup>d</sup> All-cause death within 30 days of tuberculous peritonitis or during antituberculosis treatment for tuberculous peritonitis

**Supplementary Table S3:** Summary of the cohort studies of PD patients with tuberculous peritonitis

| Author/Year                                    | Country of publication | No. of patients/Gender | Mean age (in years) | PD modality  | Mean time (in months) from PD start date to tuberculous peritonitis | Additional risk factors <sup>b</sup>                                                      | Concomitant <sup>a</sup> or within 4 weeks of another bacterial PD-associated peritonitis? | Time (in days/weeks) from onset of symptoms to diagnosis | Antituberculosis regimen                                                                                       | Duration (in months) of antituberculosis therapy | PD catheter removal (Yes/No)                                                                    | Short term outcome                                                                                                                                                                      |
|------------------------------------------------|------------------------|------------------------|---------------------|--------------|---------------------------------------------------------------------|-------------------------------------------------------------------------------------------|--------------------------------------------------------------------------------------------|----------------------------------------------------------|----------------------------------------------------------------------------------------------------------------|--------------------------------------------------|-------------------------------------------------------------------------------------------------|-----------------------------------------------------------------------------------------------------------------------------------------------------------------------------------------|
| Soto <i>et al.</i> <sup>(S71)</sup> /1989      | Spain                  | 4/3M, 1F               | 38.8                | CAPD         | 7-42 (mean duration: 16)                                            | 2 (50%) positive Mantoux test                                                             | Not reported                                                                               | Not reported                                             | 2 patients: Isoniazid, rifampicin + ethambutol<br>1 patient: isoniazid + rifampicin<br>1 patient: not reported | Not reported                                     | Yes, 4 (100%) patients                                                                          | 2 (50%) returned to CAPD<br>1 (25%) transferred to HD<br>1 (25%) died from suicide                                                                                                      |
| Cheung <i>et al.</i> <sup>(S72)</sup> /2004    | Hong Kong              | 9/6F, 3M               | Not reported        | CAPD         | Not reported                                                        | 4 (44.4%) had diabetes mellitus; 1 (11.1%) had carcinoma of the cervix                    | No                                                                                         | Median, 5 weeks                                          | Isoniazid + rifampicin + pyrazinamide                                                                          | 9-12                                             | Yes, 7 (5 due to persistent tuberculous peritonitis symptoms; 2 due to ultrafiltration failure) | 5 (55.6%) transferred to HD<br>3 (33.3%) died from septicaemia<br>1 (11.1%) remained on PD                                                                                              |
| Civilibal <i>et al.</i> <sup>(S73)</sup> /2007 | Turkey                 | 3 <sup>^</sup>         | 16.3                | CAPD         | Not reported                                                        | 1 (33.3%) of them had family history of pulmonary TB 5 years ago                          | Not reported                                                                               | 23± 6 days                                               | Isoniazid (10 mg/kg/day) + rifampicin (15 mg/kg/day) + pyrazinamide (30 mg/kg/day)                             | 12                                               | No                                                                                              | Cured                                                                                                                                                                                   |
| Prasad <i>et al.</i> <sup>(S74)</sup> /2010    | India                  | 26/10F, 16M            | 54                  | Not reported | 18.5                                                                | 26 (100%) had racial origin from endemic region (India); 1 (3.8%) had malignant condition | Not reported                                                                               | Not reported                                             | Not reported                                                                                                   | Not reported                                     | Yes, 26 (100%) patients                                                                         | 17 (65.4%) permanent HD<br>9 (34.6%) returned to PD.<br><br>Of 17 patients who transferred to HD, 14 (82.3%) died <sup>c</sup> . Only 1 (11%) of the 9 patients who returned to PD died |

| Author/Year                                  | Country of publication                    | No. of patients/Gender           | Mean age (in years)    | PD modality | Mean time (in months) from PD start date to tuberculous peritonitis | Additional risk factors <sup>b</sup>                              | Concomitant <sup>a</sup> or within 4 weeks of another bacterial PD-associated peritonitis? | Time (in days/weeks) from onset of symptoms to diagnosis | Antituberculosis regimen | Duration (in months) of antituberculosis therapy | PD catheter removal (Yes/No)                   | Short term outcome                                                                                           |
|----------------------------------------------|-------------------------------------------|----------------------------------|------------------------|-------------|---------------------------------------------------------------------|-------------------------------------------------------------------|--------------------------------------------------------------------------------------------|----------------------------------------------------------|--------------------------|--------------------------------------------------|------------------------------------------------|--------------------------------------------------------------------------------------------------------------|
| Rohit <i>et al.</i> <sup>(S75)</sup> /2010   | India                                     | 34 patients (19 male, 15 female) | Not reported           | CAPD        | 10                                                                  | Endemic region (India), 13 (38.2%) patients had diabetes mellitus | Not reported                                                                               | Not reported                                             | Not reported             | Not reported                                     | Yes; 2 (5.9%) patients had PD catheter removed | 0% died; 2 (5.9%) had catheter removal, dialysis modality was unknown for the remaining 32 (94.1%) patients. |
| Pagniez <i>et al.</i> <sup>(S76)</sup> /2012 | Country not reported (European countries) | 8 (gender not reported)          | 49-94 (median age: 78) | CAPD        | 2-82 (median 15)                                                    | 5 (62.5%) patients were coal miners                               | Not reported                                                                               | Not reported                                             | Not reported             | Not reported                                     | Yes; 2 (25%) patients had catheter removal     | 4 (50%) died (within one-month of diagnosis of tuberculous peritonitis); remaining 4 (50%) transferred to HD |

| Author/Year                                | Country of publication | No. of patients/Gender | Mean age (in years) | PD modality | Mean time (in months) from PD start date to tuberculous peritonitis | Additional risk factors <sup>b</sup>                                                     | Concomitant <sup>c</sup> or within 4 weeks of another bacterial PD-associated peritonitis?                                    | Time (days/weeks) from onset of symptoms to diagnosis | Antituberculosis regimen                                                                                                      | Duration (in months) of antituberculosis therapy | PD catheter removal (Yes/No)                                                                                                                 | Short term outcome                                                                                       |
|--------------------------------------------|------------------------|------------------------|---------------------|-------------|---------------------------------------------------------------------|------------------------------------------------------------------------------------------|-------------------------------------------------------------------------------------------------------------------------------|-------------------------------------------------------|-------------------------------------------------------------------------------------------------------------------------------|--------------------------------------------------|----------------------------------------------------------------------------------------------------------------------------------------------|----------------------------------------------------------------------------------------------------------|
| Huang <i>et al.</i> <sup>(577)</sup> /2011 | Taiwan                 | 2 <sup>^</sup>         | 49.9                | CAPD        | 8                                                                   | Unknown                                                                                  | Not reported                                                                                                                  | Not reported                                          | Isoniazid (5mg/kg/day, max 300 mg/day) + rifampicin (600 mg/day) + ethambutol (10 mg/day) + pyrazinamide (1.5 to 2000 mg/day) | 9-12                                             | 1 (before <i>M.tuberculosis</i> was identified)                                                                                              | 1 (50%) remained on CAPD<br>1 (50%) transferred to HD<br>0 (0%) died                                     |
| Ram <i>et al.</i> <sup>(578)</sup> /2013   | India                  | 11(8M, 3F)             | 49                  | CAPD        | 36                                                                  | 11 (100%) had racial origin from endemic region (India); 3 (27.3%) had diabetes mellitus | 1 (9.1%) had <i>Klebsiella pneumoniae</i> 3 weeks before tuberculous peritonitis, 1 (9.1%) had concomitant fungal peritonitis | 15 days*                                              | Isoniazid (5 mg/kg/day), rifampicin (10 mg/kg/day), pyrazinamide (10 mg/kg/day), ofloxacin (15 mg/kg/day)                     | 18                                               | 5 (3 unrelated to tuberculous peritonitis, 1 had concomitant <i>Klebsiella pneumoniae</i> peritonitis; 1 had concomitant fungal peritonitis) | 5 (45.5%) transferred to HD<br>4 (36.4%) remained on CAPD<br>2 (18.2%) died from tuberculous peritonitis |

CAPD=continuous ambulatory peritoneal dialysis; F= female; H=haemodialysis; M= male; PD= peritoneal dialysis;

<sup>a</sup> Organism identified on the same day when *M. tuberculosis* was identified or while receiving antituberculosis therapy for tuberculous peritonitis

<sup>b</sup> Racial origin from endemic countries or high TB incidence (upper-moderate) was defined as >100-299 or > 50-99 new and relapse cases per 100 000 population<sup>(79)</sup>.

<sup>c</sup> Reason of death not reported.

<sup>^</sup> Gender was not specified

\* Expressed as mean duration

**Supplementary Table S4:** Patient characteristics in patients with tuberculous peritonitis in the ANZDATA Registry analysis

| Patient no. | Gender | Age at tuberculous peritonitis | Primary kidney disease                     | Ethnicity; Country of birth | Time (in months) from PD commencement to tuberculous peritonitis | PD modality  | Was this episode a relapse or recurrence of peritonitis? | Total number of peritonitis during the study period <sup>a</sup> ; Name(s) of organism | Name of initial empirical antibiotic regimen | Concomitant bacterial peritonitis (Yes/No); Name of organism | Antituberculous regimen               | Was PD catheter removed? | Time (in days) to PD catheter removal (days)? | Short-term outcome |
|-------------|--------|--------------------------------|--------------------------------------------|-----------------------------|------------------------------------------------------------------|--------------|----------------------------------------------------------|----------------------------------------------------------------------------------------|----------------------------------------------|--------------------------------------------------------------|---------------------------------------|--------------------------|-----------------------------------------------|--------------------|
| 1           | F      | 60                             | Bilateral renal artery stenosis            | Asian; India                | 0.4                                                              | Not reported | No                                                       | 1; <i>Staphylococcus epidermidis</i>                                                   | Cefazolin + gentamicin + dicloxacillin       | No                                                           | Not reported                          | No                       | -                                             | Remained on PD     |
| 2           | F      | 49                             | Uncertain diagnosis                        | Asian; India                | 1.1                                                              | Not reported | No                                                       | 0                                                                                      | Cefazolin + ceftazidime                      | No                                                           | Not reported                          | Yes                      | 8                                             | Permanent HD       |
| 3           | F      | 61                             | Hypertensive nephrosclerosis               | White; Australia            | 32.1                                                             | Not reported | No                                                       | 3; Culture-negative, other organism (not specified), <i>Acinetobacter spp.</i>         | Vancomycin + gentamicin                      | No                                                           | Not reported                          | Yes                      | 3                                             | Permanent HD       |
| 4           | F      | 60                             | Mesangial proliferative glomerulonephritis | Asian; Philippines          | 49.3                                                             | Not reported | No                                                       | 1; <i>Streptococcus viridians</i> group                                                | Ceftriaxone + metronidazole                  | No                                                           | Not reported                          | Yes                      | 18                                            | Permanent HD       |
| 5           | M      | 89                             | Hypertensive nephrosclerosis               | White; Australia            | 5.7                                                              | Not reported | No                                                       | 0                                                                                      | Vancomycin + gentamicin                      | No                                                           | Rifampicin                            | Yes                      | 6                                             | Permanent HD       |
| 6           | F      | 38                             | Reflux nephropathy                         | Other; Ethiopia             | 27.8                                                             | APD          | No                                                       | 0                                                                                      | Cefazolin + vancomycin + ceftazidime         | No                                                           | Isoniazid + rifampicin                | Yes                      | 7                                             | Permanent HD       |
| 7           | M      | 58                             | Diabetic nephropathy                       | White; Australia            | 3.7                                                              | APD          | No                                                       | 1; Culture-negative                                                                    | Cefazolin + vancomycin + gentamicin          | No                                                           | Not reported                          | Yes                      | Not reported                                  | Permanent HD       |
| 8           | M      | 69                             | Mesangial proliferative glomerulonephritis | Asian; Cambodia             | 16.3                                                             | CAPD         | No                                                       | 0                                                                                      | Cefazolin + ceftazidime                      | No                                                           | isoniazid + rifampicin + pyrazinamide | Yes                      | 11                                            | Permanent HD       |
| 9           | F      | 35                             | Reflux nephropathy                         | White; Australia            | 2.7                                                              | CAPD         | No                                                       | 0                                                                                      | Cefazolin + gentamicin                       | No                                                           | Not reported                          | Yes                      | 2                                             | Permanent HD       |

| Patient no. | Gender | Age at tuberculous peritonitis | Primary kidney disease                     | Ethnicity               | Time (in months) from PD commencement to tuberculous peritonitis | PD modality | Was this episode a relapse or recurrence of peritonitis? | Total number of peritonitis during the study period <sup>a</sup> ; Name(s) of organism                                                                                    | Name of initial empirical antibiotic regimen          | Concomitant bacterial peritonitis (Yes/No); Name(s) of organism          | Antituberculosis regimen                             | Was PD catheter removed? | Time (in days) to PD catheter removal (days) | Short-term outcome |
|-------------|--------|--------------------------------|--------------------------------------------|-------------------------|------------------------------------------------------------------|-------------|----------------------------------------------------------|---------------------------------------------------------------------------------------------------------------------------------------------------------------------------|-------------------------------------------------------|--------------------------------------------------------------------------|------------------------------------------------------|--------------------------|----------------------------------------------|--------------------|
| 10          | F      | 89                             | Presumed glomerulonephritis                | Asian; China            | 74.4                                                             | APD         | No                                                       | 6; <i>Streptococcus viridans</i> groups, culture-negative, gram-positive organism (not specified), CNS (not specified), <i>Pseudomonas spp.</i> , <i>Escherichia coli</i> | Vancomycin + gentamicin                               | No                                                                       | Isoniazid + rifampicin + pyrazinamide                | Yes                      | 7                                            | Permanent HD       |
| 11          | F      | 56                             | Mesangial proliferative glomerulonephritis | Asian; Philippines      | 75.8                                                             | APD         | No                                                       | 0                                                                                                                                                                         | Cefazolin + gentamicin                                | No                                                                       | Rifampicin + isoniazid + pyrazinamide + moxifloxacin | Yes                      | 5                                            | Permanent HD       |
| 12          | M      | 63                             | Mesangial proliferative glomerulonephritis | White; Australia        | 38.0                                                             | APD         | No                                                       | 0                                                                                                                                                                         | Cefazolin + gentamicin                                | No                                                                       | Not reported                                         | Yes                      | 7                                            | Permanent HD       |
| 13          | M      | 65                             | Diabetic nephropathy                       | Asian; Philippines      | 19.4                                                             | CAPD        | No                                                       | 0                                                                                                                                                                         | Cefazolin + gentamicin                                | No                                                                       | Isoniazid + rifampicin                               | No                       | -                                            | Remained on PD     |
| 14          | M      | 54                             | Mesangiocapillary glomerulonephritis       | Asian; Christmas Island | 39.6                                                             | APD         | No                                                       | 2; <i>Staphylococcus aureus</i>                                                                                                                                           | Vancomycin + gentamicin                               | No                                                                       | Not reported                                         | Yes                      | 41                                           | Permanent HD       |
| 15          | M      | 65                             | Hypertensive nephrosclerosis               | Asian; Hong Kong        | 26.9                                                             | APD         | No                                                       | 1; <i>Streptococcus mitis</i>                                                                                                                                             | Cefazolin + ceftazidime + piperacillin and tazobactam | No                                                                       | Isoniazid + rifampicin + pyrazinamide                | Yes                      | 8                                            | Permanent HD       |
| 16          | M      | 67                             | Diabetic nephropathy                       | Other; Samoa            | 17.3                                                             | APD         | No                                                       | 0                                                                                                                                                                         | Cefazolin + gentamicin                                | No                                                                       | Rifampicin + pyrazinamide + moxifloxacin             | Yes                      | 8                                            | Permanent HD       |
| 17          | M      | 80                             | Diabetic nephropathy                       | Asian; Philippines      | 32.3                                                             | CAPD        | No                                                       | 0                                                                                                                                                                         | Vancomycin                                            | Yes; <i>Staphylococcus capitis</i> and <i>Streptococcus haemolyticus</i> | Rifampicin + pyrazinamide                            | No                       | -                                            | Died               |

APD= automated peritoneal dialysis; CAPD= continuous ambulatory peritoneal dialysis; F= female; HD= haemodialysis; M= male; PD= peritoneal dialysis; TB= tuberculosis

<sup>a</sup> before tuberculous peritonitis

**Supplementary Table S5: Antituberculosis regimen in the literature review- *Case studies***

| <b>Antituberculosis regimen<sup>^</sup></b>                                                                | <b>Total patient<br/>(n=151)</b> |
|------------------------------------------------------------------------------------------------------------|----------------------------------|
| Rifampicin + isoniazid + pyrazinamide                                                                      | 41 (27.2%)                       |
| Rifampicin + isoniazid + ethambutol + pyrazinamide                                                         | 36 (23.8%)                       |
| Not reported                                                                                               | 21 (13.9%)                       |
| Rifampicin + isoniazid + ethambutol                                                                        | 16 (10.6%)                       |
| Rifampicin + isoniazid                                                                                     | 9 (6.0%)                         |
| Rifampicin + isoniazid + ethambutol + streptomycin                                                         | 8 (5.3%)                         |
| Died before antituberculosis regimen was started                                                           | 6 (4.0%)                         |
| Rifampicin + isoniazid + pyrazinamide + other agent<br>(ciprofloxacin/levofloxacin/ofloxacin/moxifloxacin) | 6 (4.0%)                         |
| Rifampicin + isoniazid + other agent (streptomycin,<br>morphazinamide)                                     | 5 (3.3%)                         |
| Isoniazid + ethambutol + ofloxacin                                                                         | 1 (0.7%)                         |
| Rifampicin + ethambutol + pyrazinamide + levofloxacin                                                      | 1 (0.7%)                         |
| Rifampicin + isoniazid + morphazinamide + ciprofloxacin                                                    | 1 (0.7%)                         |

<sup>^</sup> May not total up to 100% due to rounding

**Supplementary Table S6: Antituberculosis regimen in the literature review- *Cohort studies***

| <b>Antituberculosis regimen</b>                                         | <b>Total patient (n=97)</b> |
|-------------------------------------------------------------------------|-----------------------------|
| Not reported                                                            | 69 (71.1%)                  |
| Rifampicin + isoniazid + pyrazinamide                                   | 12 (12.4%)                  |
| Rifampicin + isoniazid + pyrazinamide + other antibiotic<br>(ofloxacin) | 11 (11.3%)                  |
| Rifampicin + isoniazid + ethambutol + pyrazinamide                      | 2 (2.1%)                    |
| Rifampicin + isoniazid + ethambutol                                     | 2 (2.1%)                    |
| Rifampicin + isoniazid                                                  | 1 (1.0%)                    |

**Supplementary Table S7:** Antituberculosis regimen in the ANZDATA Registry analysis

| <b>Antituberculosis regimen</b>          | <b>Total patient (n=17)</b> |
|------------------------------------------|-----------------------------|
| Unknown regimen                          | 9 (52.9%)                   |
| Rifampicin + isoniazid + pyrazinamide    | 4 (23.5%)                   |
| Rifampicin + isoniazid                   | 2 (11.8%)                   |
| Rifampicin + pyrazinamide                | 1 (5.9%)                    |
| Rifampicin + pyrazinamide + moxifloxacin | 1 (5.9%)                    |



## SUPPLEMENTARY REFERENCES

- S1. Khanna R, Fenton S, Cattran D, Thompson D, Deitel M, Oreopoulos D. Tuberculous peritonitis in patients undergoing continuous ambulatory peritoneal dialysis (CAPD). *Peritoneal Dialysis International*. 1980;1(3):10-2.
- S2. MacCormick JOCM. Tuberculous Peritonitis in Patients on CAPD-The Importance of Lymphocytosis in the Peritoneal Fluid. *Peritoneal Dialysis International*. 1980;1(6):106-.
- S3. Morford DW. High Index of Suspicion for Tuberculous Peritonitis in CAPD Patients. *Peritoneal Dialysis International*. 1981;2(4):189-90.
- S4. Holley Jr HP, Tucker CT, Moffatt TL. Tuberculous peritonitis in patients undergoing chronic home peritoneal dialysis. *American Journal of Kidney Diseases*. 1982;1(4):222-6.
- S5. Kluge GH. Tuberculous peritonitis in a patient undergoing chronic ambulatory peritoneal dialysis (CAPD). *Peritoneal Dialysis International*. 1983;3(4):189-90.
- S6. McKerrow KJ, Neale TJ. Tuberculous peritonitis in chronic renal failure managed by continuous ambulatory peritoneal dialysis. *Australian and New Zealand Journal of Medicine*. 1983;13(4):343-7.
- S7. Cuss FM, Carmichael DJ, Linington A, Hulme B. Tuberculosis in renal failure: a high incidence in patients born in the Third World. *Clin Nephrol*. 1986;25(3):129-33.
- S8. Ludlam H, Jayne D, Phillips I. Mycobacterium tuberculosis as a cause of peritonitis in a patient undergoing continuous ambulatory peritoneal dialysis. *Journal of Infection*. 1986;12(1):75-7.
- S9. Vathsala A, Thomas A, Ng BL, Lim CH. An unusual case of peritonitis. *Ann Acad Med Singap*. 1987;16(4):666-70.
- S10. Yorioka N, Oda H, Joarder ZH, Kobayashi M, Harada S, Yamakido M. Tuberculous peritonitis in a patient undergoing continuous ambulatory peritoneal dialysis. *Hiroshima Journal of Medical Sciences*. 1988;37(2):93-5.
- S11. Cheng IK, Chan PC, Chan MK. Tuberculous peritonitis complicating long-term peritoneal dialysis. *American journal of nephrology*. 1989;9(2):155-61.
- S12. Baumgartner DD, Arterbery VE, Hale AJ, Gupta RK, Bradley SF. Peritoneal dialysis-associated tuberculous peritonitis in an intravenous drug user with acquired immunodeficiency syndrome. *American Journal of Kidney Diseases*. 1989;14(2):154-7.
- S13. Mallat SG, Brensilver JM. Tuberculous peritonitis in a CAPD patient cured without catheter removal: Case report, review of the literature, and guidelines for treatment and diagnosis. *American Journal of Kidney Diseases*. 1989;13(2):154-7.
- S14. Lye WC, Lee EJC. Tuberculous peritonitis in CAPD - A cause of hypercalcaemia. *Peritoneal Dialysis International*. 1990;10(4):307-8.
- S15. Akijado F, Luno J, Soto I, Gallego E, Junco E, Polo J, et al. Tuberculous peritonitis in patients on CAPD. *CAPD-A Decade of Experience*. 89: Karger Publishers; 1991. p. 79-86.
- S16. Tan D, Fein PA, Jordan A, Avram MM. Successful treatment of tuberculous peritonitis while maintaining patient on CAPD. *Adv Perit Dial*. 1991;7:102-4.
- S17. Kwan JTC, Hart PD, Raftery MJ, Cunningham J, Marsh FP. Mycobacterial infection is an important infective complication in British Asian dialysis patients. *Journal of Hospital Infection*. 1991;19(4):249-55.
- S18. Ong AC, Scoble JE, Baillod RA, Fernando ON, Sweny P, Moorhead JF. Tuberculous peritonitis complicating peritoneal dialysis: a case for early diagnostic laparotomy? *Nephrol Dial Transplant*. 1992;7(5):443-6.
- S19. Perez Fontan M, Rodriguez-Carmona A, Bello JA, Cao M, Valdes F. Tuberculous peritonitis in CAPD. *Nefrologia*. 1992;12(4):363-7.
- S20. Cebrian G, Urrea E, Ruiz LM, Gonzalez C. Tuberculous peritonitis in a CAPD patient *Nefrologia*. 1992;12(2):158-61.
- S21. Mousson C, Bonnin A, Dumas M, Chevet D, Rifle G. [Peritoneal tuberculosis and continuous ambulatory peritoneal dialysis]. *Nephrologie*. 1993;14(3):139-42.
- S22. Tsai TC, Hsu JC, Chou LH, Lee ML. Tuberculous peritonitis in a child undergoing continuous ambulatory peritoneal dialysis. *Zhonghua Min Guo Xiao Er Ke Yi Xue Hui Za Zhi*. 1994;35(5):455-9.

- S23. Aguirre R, Gonzalez O, Saracho R, Montenegro J. Tuberculous peritonitis secondary to Pott's disease in a patient on CAPD. [Spanish]. *Nefrologia*. 1994;14(3):351-4.
- S24. Ha SK, Lee CH, Park CH, Lee HY, Han DS. A case of tuberculous peritonitis associated with abdominal-wall pseudocyst in a patient undergoing continuous ambulatory peritoneal dialysis (CAPD). *Nephrol Dial Transplant*. 1995;10(5):706-8.
- S25. Herrera CM, Delgado RM, Riscos AG, Chaves VC, Castilla JR, Marco Guerrero MJ, et al. Mycobacterium tuberculosis as a cause of peritonitis in a patient undergoing continuous ambulatory peritoneal dialysis? *Nephron*. 1996;73(2):318-9.
- S26. Huang C-H, Chen H-S, Chen Y-M, Tsai T-J. Fibroadhesive form of tuberculous peritonitis: chyloperitoneum in a patient undergoing automated peritoneal dialysis. *Nephron*. 1996;72(4):708-11.
- S27. Lui SL, Lo CY, Choy BY, Chan TM, Lo WK, Cheng IKP. Optimal treatment and long-term outcome of tuberculous peritonitis complicating continuous ambulatory peritoneal dialysis. *American Journal of Kidney Diseases*. 1996;28(5):747-51.
- S28. Hidenori Yoshitake, Kengo Nakachi, Hiroya Tokuyama, Shinichiro Yoshi, Tomoji Gima, Kunio Yoshihara, et al. A case of tuberculous peritonitis diagnosed by preparatory laparotomy complicating continuous ambulatory peritoneal dialysis (CAPD). *Ryukyu Medical Journal*. 1998;18(1):49-52.
- S29. Ayhan Dogukan Sc, Hulya Taykapan, Mustafa Ozcan, Oktay Oymak, Cengiz Utas. Mycobacterium tuberculosis as a cause of peritonitis in a patient undergoing continuous ambulatory peritoneal dialysis. *Journal of the Turkish Nephrology*. 1998(4):217-9.
- S30. Prakash KC. Tuberculous peritonitis. *Perit Dial Int*. 1999;19 Suppl 2:S283-5.
- S31. Talwani R, Horvath JA. Tuberculous peritonitis in patients undergoing continuous ambulatory peritoneal dialysis: case report and review. *Clin Infect Dis*. 2000;31(1):70-5.
- S32. Quantrill SJ, Woodhead MA, Bell CE, Hutchison AJ, Gokal R. Peritoneal tuberculosis in patients receiving continuous ambulatory peritoneal dialysis. *Nephrology Dialysis Transplantation*. 2001;16(5):1024-7.
- S33. Gupta N, Prakash KC. Asymptomatic tuberculous peritonitis in a CAPD patient [3]. *Peritoneal Dialysis International*. 2001;21(4):416-7.
- S34. Abraham G, Mathews M, Sekar L, Srikanth A, Sekar U, Soundarajan P. Tuberculous peritonitis in a cohort of continuous ambulatory peritoneal dialysis patients. *Peritoneal dialysis international*. 2001;21(3\_suppl):202-4.
- S35. Lui SL, Lam MF, Tse KC, Lo WK. Reactivation of systemic lupus erythematosus in a dialysis patient after tuberculous peritonitis. *Lupus*. 2002;11(1):49-51.
- S36. Lye WC. Rapid diagnosis of Mycobacterium tuberculosis peritonitis in two continuous ambulatory peritoneal dialysis patients, using DNA amplification by polymerase chain reaction. *Advances in Peritoneal Dialysis*. 2002;18:154-7.
- S37. Bouraoui A, Achour A, Dhia N, Elmay M. Tuberculous peritonitis in continuous ambulatory peritoneal dialysis (CAPD)- Experience of the nephrology department- CHU Monastir (Tunisian). 2002;12(2).
- S38. Hung SC, Yang WC, Tarng DC. Fistulizing TB peritonitis during CAPD (Section Editor: GH Neild). *Nephrology Dialysis Transplantation*. 2003;18(6):1226-7.
- S39. Karayaylali I, Seyrek N, Akpolat T, Ateş K, Ozener C, Yilmaz ME, et al. The prevalence and clinical features of tuberculous peritonitis in CAPD patients in Turkey, report of ten cases from multi-centers. *Renal Failure*. 2003;25(5):819-27.
- S40. Johnson DW, Gray N, Snelling P. A peritoneal dialysis patient with fatal culture-negative peritonitis: Case Discussion. *Nephrology*. 2003;8(1):49-55.
- S41. Malik GH, Al-Harbi AS, Al-Mohaya S, Kechrid M, Sheita MS, Azhari O. Tuberculous peritonitis in patients on chronic peritoneal dialysis: case reports. *Saudi J Kidney Dis Transpl*. 2003;14(1):65-9.
- S42. Ogütmen B, Tuglular S, Al Ahdab H, Akoglu E, Ozener Q. Tuberculosis peritonitis with clear fluid accompanying systemic disseminated tuberculosis in a CAPD patient. *Perit Dial Int*. 2003;23(1):95-6.

- S43. Sahin G, Kiraz N, Sahin I, Soydan M, Akgün Y. Tuberculous peritonitis in a case receiving continuous ambulatory peritoneal dialysis(CAPD) treatment. *Ann Clin Microbiol Antimicrob*. 2004;3:19.
- S44. Vadivel N, Tucker JK, Trikudanathan S, Heher E, Singh AK. Tuberculous peritonitis: a race against time. *Kidney Int*. 2006;70(5):969-72.
- S45. Canbakan B, Ergun I, Ekmekci Y, Ates K, Karatan O. Pulmonary and peritoneal tuberculosis in a CAPD patient. *Int Urol Nephrol*. 2007;39(3):975-8.
- S46. Dervisoglu E, Sayan M, Sengul E, Yilmaz A. Rapid diagnosis of Mycobacterium tuberculosis peritonitis with real-time PCR in a peritoneal dialysis patient. *APMIS*. 2006;114(9):656-8.
- S47. Borrajo Prol M, Pérez Melón C, Novoa F E, Iglesias A, Camba M, Bravo J, et al. Tuberculous peritonitis in peritoneal dialysis. *Nefrología (English Edition)*. 2009;29(2):170-2.
- S48. Chiu C-H, Lee C-H, Chen T-C, Chen J-B, Lee C-T, Tsai Y-C, et al. Tuberculosis Peritonitis in Patients on Peritoneal Dialysis: Experience in a Medical Center. *Acta Nephrologica*. 2011;25(1):17-21.
- S49. Wang H-H, Yang L-Y, Chang J-W, Hung Y-T, Lee T-Y, Tang R-B. Eosinophilic peritonitis: an unusual manifestation of tuberculous peritonitis in peritoneal dialysis patient. *Journal of the Chinese Medical Association*. 2011;74(7):322-4.
- S50. Gursu M, Tayfur F, Besler M, Kaptanogullari O, Kucuk M, Aydin Z, et al. Tuberculosis in peritoneal dialysis patients in an endemic region. *Adv Perit Dial*. 2011;27:48-52.
- S51. Tseng W-C, Tarng D-C. Cocoon-like fibroadhesive tuberculous peritonitis in a peritoneal dialysis patient. *Chin J Physiol*. 2012;55(5):361-5.
- S52. Waness A, Al Shohaib S. Tuberculous peritonitis associated with peritoneal dialysis. *Saudi J Kidney Dis Transpl*. 2012;23(1):44-7.
- S53. Lin J-H, Wang W-J, Yang H-Y, Cheng M-H, Huang W-H, Lin C-Y, et al. Non-tuberculous and tuberculous mycobacterial peritonitis in peritoneal dialysis patients. *Renal Failure*. 2014;36(7):1158-61.
- S54. Iqbal J, Raja M, Leung J. Peritoneal tuberculosis presenting as recurrent peritonitis secondary to treatment with intravesical Bacillus Calmette-Guérin in a patient receiving peritoneal dialysis. *Clinical Kidney Journal*. 2015;8(1):107-8.
- S55. Rahal AK, Assi M. Peritoneal Tuberculosis in Dialysis: Fatal if Missed. *Kansas Journal of Medicine*. 2015;8(3):115-7.
- S56. Rahman E, Mahboob M, Aslam N. Fate of tuberculous peritonitis and Aspergillus Fumigatus Co infection in a peritoneal dialysis patient. *American Journal of Kidney Diseases*. 2015;65(4):A70.
- S57. Rohit A, Abraham G. Peritoneal dialysis related peritonitis due to Mycobacterium spp.: A case report and review of literature. *Journal of Epidemiology and Global Health*. 2016;6(4):243-8.
- S58. Edwards S, Glynn P, David MD, Kamesh L. Diagnosing Tuberculous Peritonitis Early in Patients on Peritoneal Dialysis: Use of Xpert MTB/RIF Assay. *Peritoneal Dialysis International*. 2016;36(4):461-3.
- S59. Tamayo-Isla RA, de la Cruz MC, Okpechi IG. Mycobacterial Peritonitis in CAPD Patients in Limpopo: A 6-Year Cumulative Report from a Single Center in South Africa. *Peritoneal Dialysis International*. 2016;36(2):218-22.
- S60. Ada S, Ateş TD, Canpolat T, Ersan S, Toptas T, Keşkek ŞÖ. Laparoscopic peritoneal biopsy for the diagnosis of tuberculous peritonitis in a peritoneal dialysis patient. *The Journal of Medical Research*. 2017;3(2):52-4.
- S61. Mogili HKR, Anvil Kumar CV, Boju SL, Aruna M, Mantri RG, Kalawat TC, et al. Tuberculous peritonitis diagnosed with the help of 18 F-FDG PET/CT scan. *Nephrology*. 2017;22(4):334-5.
- S62. De la Cruz-Temores S, Leonher-Ruezga K, Becerra-Muñoz L, Gallegos-Sierra C, Fuentes-Flores F. Peritonitis refractaria con hemoperitoneo por tuberculosis/Refractory peritonitis with hemoperitoneum due to tuberculosis. *Revista Medica MD*. 2017;8(3):109-13.
- S63. Patcha K, Raghavan D, Al-Rabadi L, Abraham J. Tuberculous peritonitis masquerading as diabetic gastroparesis. *Journal of the American Society of Nephrology*. 2018;29:1213.
- S64. Haikal WZ, Thiam Seong Lim C, Zakaria NF, Shah A. Refractory peritonitis: A case report of tuberculous peritonitis2019.

- S65. Aldriwesh M, Albass H, Alzaben S, Alangari R, Alajroush L, Almutairi M, et al. Tuberculous Peritonitis in a Peritoneal Dialysis Paediatric Patient: A Case Report. *Clin Med Insights Case Rep.* 2022;15:11795476221087056.
- S66. Kurniaatmaja ER, Bandiara R, Oktaviyanti IK, Rudiansyah M. A Rare Case: Tuberculous Peritonitis, Encapsulating Peritoneal Sclerosis, and Incisional Hernia in Continuous Ambulatory Peritoneal Dialysis Patient. *Open Access Macedonian Journal of Medical Sciences.* 2021;9(C):128-32.
- S67. Relvas M, Beco A, Pereira L, Oliveira A, Silvano J, Silva R, et al., editors. Clearing the clouds: Case-report and review of the literature. *Seminars in Dialysis*; 2021: Wiley Online Library.
- S68. Safae B, Mina A, Latifa D, Naima O, Rabia B, Loubna B. Tuberculous peritonitis in peritoneal dialysis: report of three cases. *Bulletin de la Dialyse à Domicile.* 2022;5(1).
- S69. Dassi M, JhaJhria A, Aggarwal N, Jha L. Tuberculous peritonitis with hemophagocytic lymphohistiocytosis in a patient on continuous ambulatory peritoneal dialysis: A case report. *Nephrology Dialysis Transplantation.* 2021;36(SUPPL 1):i401.
- S70. Yuananda A, Tjahjodjati. Peritonitis related to continuous ambulatory peritoneal dialysis due to Mycobacterium tuberculosis: A case report. *Urology Case Reports.* 2022;41 (no pagination).
- S71. Soto I, Fernández A, Gómiz E, Herrera L. Tuberculous peritonitis in patients on continuous ambulatory peritoneal dialysis (CAPD)(Spanish). *Revista Nefrologica.* 1989.
- S72. Cheung S, Liu Y, Wong F, Chan Y, Chak W, Wong H, et al. A single center study of tuberculous peritonitis complicating continuous ambulatory peritoneal dialysis in Hong Kong. *Hong Kong Journal of Nephrology.* 2004;6(2):A1.
- S73. Çivilibal M, Sever L, Çalışkan S, Candan C, Emir H, Diren ŞB, et al. Tuberculous peritonitis in pediatric dialysis patients: Report of five cases. *Cocuk Sagligi ve Hastaliklari Dergisi.* 2007;50(1):25-30.
- S74. Prasad N, Kapoor G, Prasad KN, Gupta A, Sharma RK, Bhadauria D. Tuberculous peritonitis in PD patients: Clinical profiles and outcomes study from Northern India. *Peritoneal Dialysis International.* 2010;2):S107.
- S75. Rohit A, Revathi L, Reddy YNV, Mathew M, Abraham G. Tuberculous peritonitis-an entity lesser known. *Peritoneal Dialysis International.* 2010;2):S89.
- S76. Pagniez D, Florence M, Celia L, Baptiste BJ. Eight cases of tuberculous peritonitis in a european PD center. *Peritoneal Dialysis International.* 2012;1):S20.
- S77. Huang H-W, Chen C-H, Cheng C-H, Wu M-J, Yu T-M, Chuang Y-W, et al. Tuberculosis Infection in Patients on Peritoneal Dialysis: Experience in a Medical Center. *Acta Nephrologica.* 2011;25(1):12-6.
- S78. Ram R, Swarnalatha G, Akpolat T, Dakshinamurty KV. Mycobacterium tuberculosis peritonitis in CAPD patients: a report of 11 patients and review of literature. *International urology and nephrology.* 2013;45(4):1129-35.
- S79. WHO global lists of high burden countries for tuberculosis (TB), TB/HIV and multidrug/rifampicin-resistant TB (MDR/RR-TB), 2021-2025 World Health Organization; [Available from: [https://cdn.who.int/media/docs/default-source/hq-tuberculosis/who\\_globalhbcliststb\\_2021-2025\\_backgrounddocument.pdf?sfvrsn=f6b854c2\\_9](https://cdn.who.int/media/docs/default-source/hq-tuberculosis/who_globalhbcliststb_2021-2025_backgrounddocument.pdf?sfvrsn=f6b854c2_9).
